# Supplementary material for: Tracking Clonal Evolution of Multiple Myeloma Using Targeted Next-Generation DNA Sequencing
Source: MDPI journal article supplement (doi:10.3390/biomedicines10071674), 2022-07-12
Supplement: s1 [file s1]

Table S1. Summary of the genetic profile of each subsequent sample.

## a) Cases with diagnostic sample (a total of 2 or 3 samples)

| Patient ID | Data type | 1st sample                                                                                                                                          | 2nd sample                                                                                                                                                                               | 3rd sample                                                                                                                                                             |
|------------|-----------|-----------------------------------------------------------------------------------------------------------------------------------------------------|------------------------------------------------------------------------------------------------------------------------------------------------------------------------------------------|------------------------------------------------------------------------------------------------------------------------------------------------------------------------|
| 1          | -         | diagnosis                                                                                                                                           | PD1b                                                                                                                                                                                     | PD1                                                                                                                                                                    |
|            | SNV       | <u>CREBBP</u> , <u>PABPC1</u>                                                                                                                       | <u>CREBBP</u> , <u>PABPC1</u>                                                                                                                                                            | <u>CREBBP</u>                                                                                                                                                          |
|            | CNV       | +5, gain 1q, gain 6p, gain 15q, loss 13q, loss 22q                                                                                                  | +19, gain 1q, gain 6p, gain 15q, loss 1p22.1, loss 2q (partial), loss 6q (partial), loss 13q, loss 20q, loss 22q                                                                         | +5, +19, gain 1q, gain 6p, gain 15q, loss 1p22.1, loss 2q (partial), loss 6q (partial), loss 13q, loss 22q                                                             |
|            | FISH      | No detectable 14q32 translocations                                                                                                                  | No detectable 14q32 translocations                                                                                                                                                       | No detectable 14q32 translocations                                                                                                                                     |
| 2          | -         | diagnosis                                                                                                                                           | PD1                                                                                                                                                                                      | -                                                                                                                                                                      |
|            | SNV       | <u>RET</u> , <u>KRAS</u> , <u>CDKN2C</u>                                                                                                            | <u>RET</u> , <u>KRAS</u>                                                                                                                                                                 | -                                                                                                                                                                      |
|            | CNV       | gain 1q21, +3, +5, +7, +9 (partial), gain 15q, gain 19p, +21 (partial), loss 1p, loss 16q (partial), loss 18q, loss 22q                             | gain 1q, gain 1p (partial), +3, +5, gain 6p22.1, +7, +9 (partial), gain 11q24, gain 15q, gain 19p, +21 (partial), loss 1p12, loss 18q, loss 22q                                          | -                                                                                                                                                                      |
|            | FISH      | No detectable 14q32 translocations                                                                                                                  | No detectable 14q32 translocations                                                                                                                                                       | -                                                                                                                                                                      |
| 3          | -         | diagnosis                                                                                                                                           | PD1                                                                                                                                                                                      | -                                                                                                                                                                      |
|            | SNV       | <u>BRAF</u> , <u>FANCA</u> , <u>LRP1B</u>                                                                                                           | <u>BRAF</u> , <u>FANCA</u>                                                                                                                                                               | -                                                                                                                                                                      |
|            | CNV       | gain 1q, +3, gain 5q (partial), +6 (partial), gain 15q, +19, +21 (partial), loss 6q (partial), -8, -20, loss 22q                                    | gain 1q, gain 1p (partial), +3, +6 (partial), gain 15q, +19, +21 (partial), -8, -20                                                                                                      | -                                                                                                                                                                      |
|            | FISH      | No detectable 14q32 translocations                                                                                                                  | No detectable 14q32 translocations                                                                                                                                                       | -                                                                                                                                                                      |
| 4          | -         | diagnosis                                                                                                                                           | PD1                                                                                                                                                                                      | -                                                                                                                                                                      |
|            | SNV       | <u>KRAS</u> , <u>MLH1</u> , <u>APC</u> , <u>PABPC1</u>                                                                                              | <u>KRAS</u> , <u>MLH1</u> , <u>APC</u>                                                                                                                                                   | -                                                                                                                                                                      |
|            | CNV       | +5, +11, gain 15q, loss 1p (partial), loss 6q, loss 18q                                                                                             | gain 1q, +5, gain 6p22.1, +11, gain 15q, gain 20q (partial), loss 1p (partial), -6 (partial), loss 18q                                                                                   | -                                                                                                                                                                      |
|            | FISH      | No detectable 14q32 translocations                                                                                                                  | No detectable 14q32 translocations                                                                                                                                                       | -                                                                                                                                                                      |
| 5          | -         | diagnosis                                                                                                                                           | PD1                                                                                                                                                                                      | -                                                                                                                                                                      |
|            | SNV       | <u>DNAH5</u> , <u>KRAS</u> , <u>JAK3</u> , <u>SAMHD1</u> , <u>PABPC1</u>                                                                            | <u>DNAH5</u> , <u>KRAS</u> , <u>JAK3</u> , <u>SAMHD1</u> , <u>KMT2C</u>                                                                                                                  | -                                                                                                                                                                      |
|            | CNV       | gain 1q, gain 6p22.1, gain 8q (partial), loss 16q (partial)                                                                                         | +1, gain 6p22.1, gain 8q (partial), gain 20q (partial), loss 13q (partial), loss 20p (partial),                                                                                          | -                                                                                                                                                                      |
|            | FISH      | Translocation 14q32 other than t(4;14) and t(14;16)                                                                                                 | Translocation 14q32 other than t(4;14) and t(14;16)                                                                                                                                      | -                                                                                                                                                                      |
| 6          | -         | diagnosis                                                                                                                                           | PD1                                                                                                                                                                                      | -                                                                                                                                                                      |
|            | SNV       | <u>RYR2</u> , <u>ARID4B</u> , <u>NCOR2</u>                                                                                                          | <u>RYR2</u> , <u>ARID4B</u> , <u>PABPC1</u> , <u>KRAS</u> , <u>LRP1B</u>                                                                                                                 | -                                                                                                                                                                      |
|            | CNV       | +3, +5, gain 6p22.1, +9, +11, gain 15q, +19, loss 1p (partial), loss 16q (partial), -18                                                             | +3, +5, gain 6p22.1, +9, +11, gain 15q, +19, loss 1p (partial)                                                                                                                           | -                                                                                                                                                                      |
|            | FISH      | No detectable 14q32 translocations                                                                                                                  | No detectable 14q32 translocations, <u>TP53</u> deletion                                                                                                                                 | -                                                                                                                                                                      |
| 7          | -         | diagnosis                                                                                                                                           | PD1b                                                                                                                                                                                     | PD1                                                                                                                                                                    |
|            | SNV       | <u>PABPC1</u> (c.1223A>T), <u>KRAS</u> , <u>ARID2</u> , <u>IDH2</u> , <u>BRCA2</u> , <u>KMT2B</u>                                                   | <u>PABPC1</u> (c.1223A>T), <u>KRAS</u> , <u>ARID2</u> , <u>BRCA2</u> , <u>KMT2B</u> , <u>PABPC1</u> (c.1246A>T), <u>PABPC1</u> (c.1255C>T), <u>ZFXH3</u>                                 | <u>PABPC1</u> (c.1223A>T), <u>KRAS</u> , <u>ARID2</u> , <u>BRCA2</u> , <u>KMT2B</u> , <u>PABPC1</u> (c.1246A>T), <u>PABPC1</u> (c.1255C>T), <u>ZFXH3</u> , <u>FAT4</u> |
|            | CNV       | +3, +6, +7, +9, +11, gain 15q, +18, +19, +21 (partial)                                                                                              | +3, +6, +7, +9, +11, gain 15q, +18, +19, +21 (partial)                                                                                                                                   | +3, +6, +7, +9, +11, gain 15q, +18, +19, +21 (partial), loss 14q, loss 16q                                                                                             |
|            | FISH      | No detectable 14q32 translocations                                                                                                                  | No detectable 14q32 translocations                                                                                                                                                       | No detectable 14q32 translocations                                                                                                                                     |
| 8          | -         | diagnosis                                                                                                                                           | PD1                                                                                                                                                                                      | -                                                                                                                                                                      |
|            | SNV       | <u>NOTCH2</u> , <u>EP300</u> , <u>CDKN1B</u> , <u>TBX3</u> , <u>PABPC1</u>                                                                          | <u>NOTCH2</u> , <u>EP300</u> , <u>CDKN1B</u> , <u>TBX3</u>                                                                                                                               | -                                                                                                                                                                      |
|            | CNV       | gain 1q (partial), +7, gain 8q, gain 9q (partial), gain 19p, loss 6q, loss 8p, -12, loss 13q, -16, loss 17p (partial), loss 19q (partial), loss 22q | +1, +7, gain 6p22.1, gain 8q, gain 9p, gain 19p, gain 21q, loss 2q, loss 3q26, -4, -6 (partial), loss 8p, -10, -12, loss 13q, loss 16q, loss 17p (partial), loss 19q (partial), loss 22q | -                                                                                                                                                                      |
|            | FISH      | Translocation 14q32 other than t(4;14) and t(14;16), <u>TP53</u> deletion                                                                           | No data available                                                                                                                                                                        | -                                                                                                                                                                      |
| 10         | -         | diagnosis                                                                                                                                           | PD1                                                                                                                                                                                      | -                                                                                                                                                                      |

|    |            |                                                                                                                                                                                                                                         |                                                                                                                                                                                                                                                                                                                                                                                                                                                     |   |
|----|------------|-----------------------------------------------------------------------------------------------------------------------------------------------------------------------------------------------------------------------------------------|-----------------------------------------------------------------------------------------------------------------------------------------------------------------------------------------------------------------------------------------------------------------------------------------------------------------------------------------------------------------------------------------------------------------------------------------------------|---|
|    | <u>SNV</u> | <u>FAT4</u> , KRAS, ARID1A, RYR2, ATR, KMT2D, EDC4, <u>MAP3K14</u> , <u>LRP1B</u> (c.3058C>A), <u>MAN2C1</u> , <u>ZFH3</u> (c.10523G>C), <u>HUWE1</u> , <u>LRP1B</u> (c.3075T>G), <u>NCOR2</u> , <u>ZFH3</u> (c.10520G>C), <u>EP300</u> | <u>FAT4</u> , <u>ATM</u> , KRAS, ARID1A, RYR2, ATR, KMT2D, EDC4, <u>MAP3K14</u>                                                                                                                                                                                                                                                                                                                                                                     | - |
|    | CNV        | gain 1q, gain 6p22.1, gain 15q                                                                                                                                                                                                          | gain 1q, +3, +5, gain 6p22.1, +9, gain 15q, +19, -4, loss 14q                                                                                                                                                                                                                                                                                                                                                                                       | - |
|    | FISH       | No detectable 14q32 translocations                                                                                                                                                                                                      | No detectable 14q32 translocations                                                                                                                                                                                                                                                                                                                                                                                                                  | - |
| 12 | -          | diagnosis                                                                                                                                                                                                                               | PD1                                                                                                                                                                                                                                                                                                                                                                                                                                                 | - |
|    | <u>SNV</u> | <u>RYR2</u> , CYLD                                                                                                                                                                                                                      | <u>RYR2</u> , CYLD, <u>ZFH3</u>                                                                                                                                                                                                                                                                                                                                                                                                                     | - |
|    | CNV        | +2, +3, gain 6p, +8, +9 (partial), +11, gain 15q, +18, +19, -4, loss 6q, -10, loss 13q, loss 16q                                                                                                                                        | gain 6p, gain 15q, +7, +18, +19, -4, loss 6q, -10, -12, loss 1p, loss 1q (partial), loss 13q, loss 14q, loss 16q, -17 (partial), -20, loss 21q                                                                                                                                                                                                                                                                                                      | - |
|    | FISH       | No detectable 14q32 translocations                                                                                                                                                                                                      | No detectable 14q32 translocations                                                                                                                                                                                                                                                                                                                                                                                                                  | - |
| 13 | -          | diagnosis                                                                                                                                                                                                                               | PD1                                                                                                                                                                                                                                                                                                                                                                                                                                                 | - |
|    | <u>SNV</u> | KRAS, MPL, GNAS, <u>PABPC1</u>                                                                                                                                                                                                          | KRAS, MPL, GNAS, <u>SOX9</u>                                                                                                                                                                                                                                                                                                                                                                                                                        | - |
|    | CNV        | +3, +5, gain 6p (partial), +9, +11, gain 15q, gain 19q (partial), loss 1p, -17                                                                                                                                                          | +3, +9, +11, gain 15q, loss 1p, loss 17p (partial)                                                                                                                                                                                                                                                                                                                                                                                                  | - |
|    | FISH       | No detectable 14q32 translocations                                                                                                                                                                                                      | No detectable 14q32 translocations, TP53 deletion                                                                                                                                                                                                                                                                                                                                                                                                   | - |
| 14 | -          | diagnosis                                                                                                                                                                                                                               | PD1                                                                                                                                                                                                                                                                                                                                                                                                                                                 | - |
|    | <u>SNV</u> | <u>BCL7A</u> , <u>SP140</u> , <u>TP53</u> (c.818G>A), <u>FUBP1</u> , <u>NTRK2</u>                                                                                                                                                       | <u>BCL7A</u> , <u>SP140</u> , <u>ATR</u> , <u>KDM5A</u> , <u>TP53</u> (c.711G>A), <u>ZNF292</u>                                                                                                                                                                                                                                                                                                                                                     | - |
|    | CNV        | gain 6p22.1, loss 17p (partial), loss 14q, loss 22q                                                                                                                                                                                     | gain 6p22.1, loss 17p (partial), loss 17q (partial), loss 1p (partial), loss 13q, loss 22q                                                                                                                                                                                                                                                                                                                                                          | - |
|    | FISH       | No detectable 14q32 translocations, TP53 deletion                                                                                                                                                                                       | No detectable 14q32 translocations, TP53 deletion                                                                                                                                                                                                                                                                                                                                                                                                   | - |
| 17 | -          | diagnosis                                                                                                                                                                                                                               | PD3                                                                                                                                                                                                                                                                                                                                                                                                                                                 | - |
|    | <u>SNV</u> | ALK, KLHL6, <u>DNAH5</u>                                                                                                                                                                                                                | ALK, KLHL6, <u>DNAH5</u>                                                                                                                                                                                                                                                                                                                                                                                                                            | - |
|    | CNV        | gain 6p, gain 8q (partial), loss 6q, -8 (partial), loss 16q                                                                                                                                                                             | gain 6p, gain 8q (partial), loss 6q, -8 (partial), loss 16q                                                                                                                                                                                                                                                                                                                                                                                         | - |
|    | FISH       | t(11;14)                                                                                                                                                                                                                                | t(11;14)                                                                                                                                                                                                                                                                                                                                                                                                                                            | - |
| 18 | -          | diagnosis                                                                                                                                                                                                                               | PD2                                                                                                                                                                                                                                                                                                                                                                                                                                                 | - |
|    | <u>SNV</u> | KRAS                                                                                                                                                                                                                                    | KRAS, <u>PABPC1</u> (c.1240C>T), <u>PABPC1</u> (c.1223A>T)                                                                                                                                                                                                                                                                                                                                                                                          | - |
|    | CNV        | gain 6 p (partial)                                                                                                                                                                                                                      | -                                                                                                                                                                                                                                                                                                                                                                                                                                                   | - |
|    | FISH       | Translocation 14q32 other than t(4;14) and t(14;16)                                                                                                                                                                                     | Translocation 14q32 other than t(4;14) and t(14;16)                                                                                                                                                                                                                                                                                                                                                                                                 | - |
| 19 | -          | diagnosis                                                                                                                                                                                                                               | PD3                                                                                                                                                                                                                                                                                                                                                                                                                                                 | - |
|    | <u>SNV</u> | <u>CSMD3</u> , <u>EGR1</u>                                                                                                                                                                                                              | <u>CSMD3</u> , <u>EGR1</u> , KRAS                                                                                                                                                                                                                                                                                                                                                                                                                   | - |
|    | CNV        | gain 1q, +3, +5, +7, +9, gain 15q, +18, +19, loss 1p (partial), loss 13q                                                                                                                                                                | gain 1q, +3, +7, gain 6p, gain 6q (partial), gain 15q, +18, +19, loss 10p, loss 13q                                                                                                                                                                                                                                                                                                                                                                 | - |
|    | FISH       | No detectable 14q32 translocations                                                                                                                                                                                                      | No detectable 14q32 translocations                                                                                                                                                                                                                                                                                                                                                                                                                  | - |
| 20 | -          | diagnosis                                                                                                                                                                                                                               | PD3                                                                                                                                                                                                                                                                                                                                                                                                                                                 | - |
|    | <u>SNV</u> | <u>EGR1</u> , <u>LRRK2</u> , <u>KRAS</u> , <u>DIS3</u>                                                                                                                                                                                  | <u>EGR1</u> , <u>LRRK2</u> , <u>CD79A</u> , <u>PBRM1</u>                                                                                                                                                                                                                                                                                                                                                                                            | - |
|    | CNV        | +11, loss 14q (partial)                                                                                                                                                                                                                 | loss 14q (partial), loss 1 p (partial), loss 2q (partial), loss 6q, loss 10q (partial), loss 12q (partial), loss 13q, -17, gain 6p, gain 11q, gain 15q                                                                                                                                                                                                                                                                                              | - |
|    | FISH       | Translocation 14q32 other than t(4;14) and t(14;16)                                                                                                                                                                                     | Translocation 14q32 other than t(4;14) and t(14;16), <u>TP53</u> deletion                                                                                                                                                                                                                                                                                                                                                                           | - |
| 21 | -          | diagnosis                                                                                                                                                                                                                               | PD3                                                                                                                                                                                                                                                                                                                                                                                                                                                 | - |
|    | <u>SNV</u> | ARID1A (c.2397G>T), ARID1A (c.2390G>C), KRAS, <u>MAP3K14</u> , RYR2, TET2, ABCF1, ZFH3 (c.8780G>C), ZFH3 (c.2556C>G), DICER1, <u>PABPC1</u>                                                                                             | ARID1A (c.2397G>T), ARID1A (c.2390G>C), KRAS, <u>MAP3K14</u> , RYR2, TET2, ABCF1, ZFH3 (c.8780G>C), ZFH3 (c.2556C>G), DICER1, <u>ALK</u> , <u>EIF4G2</u> , <u>NFKB2</u> , <u>NOTCH3</u> , <u>KMT2B</u> , <u>KDM5C</u> , <u>ARID1A</u> (c.4208T>G), <u>DNMT3A</u> , <u>FAT4</u> , <u>PRDM9</u> , <u>KMT2D</u> , <u>TP53</u> (c.814G>A), <u>TP53</u> (c.550G>C), <u>RYR1</u> , <u>RUNX1</u> , <u>HUWE1</u> , <u>SOX9</u> , <u>STAT6</u> , <u>UBR5</u> | - |
|    | CNV        | gain 1q, gain 2p, +3, gain 4p, +5, +6, +7, +9, +11, gain 15q, +19, +21 (partial), loss 1p, loss 2q, loss 4q, -8, -10, -12, loss 13q, loss 14q, -16, -17, -18, -20, loss 22q                                                             | gain 1q, +5, loss 1p, loss 4q, -8, -10, -12, loss 13q, loss 14q, loss 16q (partial), -17, -18, -20                                                                                                                                                                                                                                                                                                                                                  | - |
|    | FISH       | Translocation 14q32 other than t(4;14) and t(14;16)                                                                                                                                                                                     | Translocation 14q32 other than t(4;14) and t(14;16)                                                                                                                                                                                                                                                                                                                                                                                                 | - |

b) Cases with diagnostic sample (a total of 4 samples)

| Patient ID | Data type | 1st sample                                                                                   | 2nd sample                                                                                                        | 3rd sample                                                                                            | 4th sample                                                                                                |
|------------|-----------|----------------------------------------------------------------------------------------------|-------------------------------------------------------------------------------------------------------------------|-------------------------------------------------------------------------------------------------------|-----------------------------------------------------------------------------------------------------------|
| 16         | -         | <u>diagnosis</u>                                                                             | PD1                                                                                                               | PD2                                                                                                   | PD3                                                                                                       |
|            | SNV       | <u>BRCA2</u> , DIS3, RYR2, ATRX, <u>DNAH11</u> , SPEN, FAT4, SOX9, ZFHX3, RUNX1, LRP1B, EDC4 | <u>BRCA2</u> , DIS3, RYR2, ATRX <u>DNAH11</u>                                                                     | <u>BRCA2</u> , DIS3, RYR2, ATRX, <u>DNAH11</u> , LRP1B, EDC4, CYLD (c.2065C>T)                        | <u>BRCA2</u> , DIS3, RYR2, ATRX, LRP1B, EDC4, CYLD (c.2065C>T), CYLD (c.2465A>G), FAT4, SOX9, ZFHX3, SPEN |
|            | CNV       | gain 6p22.1, +9, <u>gain 16p</u> , gain 17q, loss 16q, loss 17p (partial)                    | gain 6p22.1, <u>+7</u> , +9, gain 17q, loss 16q, loss 17p (partial), <u>loss 6q (partial)</u> , <u>loss 18q</u> , | <u>gain 6p22.1</u> , <u>+7</u> , +9, gain 17q, loss 16q, loss 17p (partial), <u>loss 6q (partial)</u> | <u>+7</u> , +9, gain 17q, loss 16q, loss 17p (partial), <u>loss 6q (partial)</u>                          |
|            | FISH      | t(11;14) plus TP53 deletion                                                                  | t(11;14) plus TP53 deletion                                                                                       | t(11;14) plus TP53 deletion                                                                           | No data available                                                                                         |
| 22         | -         | <u>diagnosis</u>                                                                             | PD2                                                                                                               | PD3                                                                                                   | PD4                                                                                                       |
|            | SNV       | PABPC1, BRCA2                                                                                | PABPC1, BRCA2, <u>BRAF</u> , <u>XBP1</u>                                                                          | PABPC1, BRCA2, <u>BRAF</u> , <u>XBP1</u>                                                              | PABPC1, BRCA2, <u>BRAF</u> , <u>XBP1</u>                                                                  |
|            | CNV       | gain 1q, +3, loss 1p, gain 6p22.1, loss 7p (partial), loss 13q, <u>-18</u>                   | gain 1q, +3, gain 6p22.1, <u>gain 9q</u> , loss 1p, loss 7p (partial), loss 13q                                   | gain 1q, +3, gain 6p22.1, loss 1p, loss 7p (partial), loss 13q,                                       | gain 1q, +3, gain 6p22.1, loss 1p, loss 7p (partial), loss 13q, <u>loss 14q</u> , <u>-18</u>              |
|            | FISH      | t(4;14)                                                                                      | No data available                                                                                                 | t(4;14)                                                                                               | No data available                                                                                         |

c) Cases with only relapsed samples

| Patient ID | Data type | 1st sample                       | 2nd sample                                          | 3rd sample                                                                |
|------------|-----------|----------------------------------|-----------------------------------------------------|---------------------------------------------------------------------------|
| 23         | -         | PD3                              | PD4                                                 | PD5                                                                       |
|            | SNV       | <u>KRAS</u> , PABPC1, HIST1H1E   | <u>KRAS</u> , PABPC1, HIST1H1E, <u>SF3B1</u>        | <u>KRAS</u> , PABPC1, HIST1H1E, <u>SF3B1</u>                              |
|            | CNV       | +1, loss 13q, loss 22q (partial) | +1, <u>loss 3p26</u> , loss 13q, loss 22q (partial) | +1, <u>gain 6p22.1</u> , <u>gain 19q14</u> , loss 13q, loss 22q (partial) |

|    |          |                                                                                                                                                                                                                                                                                                                                                                                                                                                                 |                                                                                                                                                                                                                                                                                                                                                    |                                                     |
|----|----------|-----------------------------------------------------------------------------------------------------------------------------------------------------------------------------------------------------------------------------------------------------------------------------------------------------------------------------------------------------------------------------------------------------------------------------------------------------------------|----------------------------------------------------------------------------------------------------------------------------------------------------------------------------------------------------------------------------------------------------------------------------------------------------------------------------------------------------|-----------------------------------------------------|
|    | FIS<br>H | Translocation 14q32 other than t(4;14) and t(14;16)                                                                                                                                                                                                                                                                                                                                                                                                             | Translocation 14q32 other than t(4;14) and t(14;16)                                                                                                                                                                                                                                                                                                | Translocation 14q32 other than t(4;14) and t(14;16) |
| 24 | -        | PD1                                                                                                                                                                                                                                                                                                                                                                                                                                                             | PD2                                                                                                                                                                                                                                                                                                                                                |                                                     |
|    | SN<br>V  | HIST1H1C, DNAH11, <u>EGFR</u> , DUSP2 (c.662G>C), CCND1 (c.28G>A), CCND1 (c.131A>C), ATM, DUSP2 (c.720A>G), CYLD, <u>ZFHX3 (c.10523G&gt;C)</u> ,                                                                                                                                                                                                                                                                                                                | HIST1H1C, DNAH11, <u>EGFR</u> , DUSP2 (c.662G>C), <u>CCND1 (c.28G&gt;A)</u> , CCND1 (c.131A>C), ATM, DUSP2 (c.720A>G), CYLD, <u>PAK2</u>                                                                                                                                                                                                           | -                                                   |
|    | CN<br>V  | gain 1q, gain 3q (partial), <u>gain 6p (partial)</u> , +7, <u>gain 8q</u> , +18, loss 16q, <u>loss 8p</u>                                                                                                                                                                                                                                                                                                                                                       | gain 1q, gain 3q (partial), +7, +18, loss 16q                                                                                                                                                                                                                                                                                                      | -                                                   |
|    | FIS<br>H | Translocation 14q32 other than t(4;14) and t(14;16)                                                                                                                                                                                                                                                                                                                                                                                                             | No data available                                                                                                                                                                                                                                                                                                                                  |                                                     |
| 25 | -        | PD1                                                                                                                                                                                                                                                                                                                                                                                                                                                             | PD2                                                                                                                                                                                                                                                                                                                                                |                                                     |
|    | SN<br>V  | <u>FANCA</u> , <u>ATM</u> ,                                                                                                                                                                                                                                                                                                                                                                                                                                     | <u>FANCA</u> , <u>ATM</u> , <u>PABPC1</u>                                                                                                                                                                                                                                                                                                          | -                                                   |
|    | CN<br>V  | gain 1q (partial), <u>gain 6p (partial)</u> , gain 9p, <u>gain 16p</u> , gain 17q, loss 1p (partial), loss 2q, loss 4q (partial), loss 5q, loss 11q (partial), -12, loss 13q, loss 16q (partial), loss 20p, loss 22q                                                                                                                                                                                                                                            | gain 1q (partial), <u>gain 5p</u> , gain 9p, gain 17q, loss 1p (partial), loss 2q, loss 4q (partial), loss 5q, loss 11q (partial), -12, loss 13q, loss 16q (partial), <u>loss 17p (partial)</u> , loss 20p, loss 22q                                                                                                                               | -                                                   |
|    | FIS<br>H | t(4;14)                                                                                                                                                                                                                                                                                                                                                                                                                                                         | t(4;14) + delTP53                                                                                                                                                                                                                                                                                                                                  |                                                     |
| 26 | -        | PD2                                                                                                                                                                                                                                                                                                                                                                                                                                                             | PD3                                                                                                                                                                                                                                                                                                                                                |                                                     |
|    | SN<br>V  | <u>RET</u> , KRAS, BRIP1, TET2, TP53, <u>HIST1H1C</u> , ETV6                                                                                                                                                                                                                                                                                                                                                                                                    | <u>RET</u> , KRAS, BRIP1, TET2, TP53, <u>HIST1H1C</u> , ETV6                                                                                                                                                                                                                                                                                       | -                                                   |
|    | CN<br>V  | <u>+1</u> , +6, +9, gain 15q, +19, loss 13q, loss 14q, loss 17p (partial), <u>loss 18q</u>                                                                                                                                                                                                                                                                                                                                                                      | gain 1q (partial) +6, +9, gain 15q, <u>gain 18p</u> , +19, loss 13q, loss 14q, loss 17p partial,                                                                                                                                                                                                                                                   | -                                                   |
|    | FIS<br>H | No detectable 14q32 translocations, TP53 deletion                                                                                                                                                                                                                                                                                                                                                                                                               | No detectable 14q32 translocations, TP53 deletion                                                                                                                                                                                                                                                                                                  |                                                     |
| 27 | -        | PD4                                                                                                                                                                                                                                                                                                                                                                                                                                                             | PD5                                                                                                                                                                                                                                                                                                                                                |                                                     |
|    | SN<br>V  | KMT2C, ERN1                                                                                                                                                                                                                                                                                                                                                                                                                                                     | KMT2C, ERN1, <u>TP53</u>                                                                                                                                                                                                                                                                                                                           | -                                                   |
|    | CN<br>V  | gain 1q, <u>gain 6p22.1</u> , loss 13q, gain 15q, gain 17q (partial), loss 17q (partial), <u>loss 18q</u> , +19                                                                                                                                                                                                                                                                                                                                                 | gain 1q (partial), gain 15q, gain 17q (partial), loss 13q, <u>loss 17p</u> , loss 17q (partial), +19                                                                                                                                                                                                                                               | -                                                   |
|    | FIS<br>H | t(4;14), TP53 deletion                                                                                                                                                                                                                                                                                                                                                                                                                                          | t(4;14), TP53 deletion                                                                                                                                                                                                                                                                                                                             |                                                     |
| 28 | -        | PD1                                                                                                                                                                                                                                                                                                                                                                                                                                                             | PD2                                                                                                                                                                                                                                                                                                                                                |                                                     |
|    | SN<br>V  | <u>RET</u> , <u>BRCA2</u> , FGFR3                                                                                                                                                                                                                                                                                                                                                                                                                               | <u>RET</u> , <u>BRCA2</u> , FGFR3                                                                                                                                                                                                                                                                                                                  | -                                                   |
|    | CN<br>V  | gain 1q                                                                                                                                                                                                                                                                                                                                                                                                                                                         | gain 1q, <u>gain 15q</u> , <u>gain 17q (partial)</u> , <u>loss 3p (partial)</u> , <u>loss 8p (partial)</u> , <u>loss 13q</u> , <u>loss 16q (partial)</u> , <u>loss 18q</u>                                                                                                                                                                         | -                                                   |
|    | FIS<br>H | t(4;14)                                                                                                                                                                                                                                                                                                                                                                                                                                                         | t(4;14)                                                                                                                                                                                                                                                                                                                                            |                                                     |
| 29 | -        | PD5                                                                                                                                                                                                                                                                                                                                                                                                                                                             | PD6                                                                                                                                                                                                                                                                                                                                                |                                                     |
|    | SN<br>V  | SETD2, TET2, <u>KMT2C (c.6368C&gt;G)</u> , KMT2C (c.5013G>T), KMT2B, SPEN, <u>ID3</u> , ATR, <u>FAT4</u> , <u>SYNE1</u> , <u>POT1</u> , <u>BRAF</u> , EDC4, HMCN1, ATM (c.6745G>T), HUWE1, DNAH11, DICER1, SOX9, <u>ZFHX3 (c.8440G&gt;A)</u> , ZFHX3 (c.2556C>G), <u>RBX1</u> , <u>USP9X</u> , HMCN1, PIK3CA (c.42C>G), ZNF292, <u>RYR2</u> , <u>ABCF1</u> , <u>ATM (c.6739A&gt;C)</u> , <u>PIK3CA (c.40C&gt;A)</u> , <u>PIK3CA (c.44T&gt;G)</u> , <u>NCOR2</u> | SETD2, TET2, <u>KMT2C (c.6368C&gt;G)</u> , KMT2C (c.5013G>T), KMT2B, SPEN, <u>ID3</u> , ATR, <u>FAT4</u> , <u>SYNE1</u> , <u>POT1</u> , <u>BRAF</u> , KMT2C, EDC4, HMCN1, ATM (c.6745G>T), HUWE1, DNAH11, DICER1, SOX9, <u>ZFHX3 (c.8440G&gt;A)</u> , ZFHX3 (c.2556C>G), <u>RBX1</u> , <u>USP9X</u> , HMCN1, PIK3CA (c.42C>G), ZNF292, <u>TP53</u> | -                                                   |
|    | CN<br>V  | gain 1q, gain 6p22.1, loss 1p (partial), loss 13q, loss 17p (partial)                                                                                                                                                                                                                                                                                                                                                                                           | gain 1q, loss 1p (partial), gain 6p22.1, loss 13q, loss 17p, <u>+18</u>                                                                                                                                                                                                                                                                            |                                                     |
|    | FIS<br>H | Translocation 14q32 not specified, TP53 deletion                                                                                                                                                                                                                                                                                                                                                                                                                | Translocation 14q32 not specified, TP53 deletion                                                                                                                                                                                                                                                                                                   |                                                     |
| 30 | -        | PD5                                                                                                                                                                                                                                                                                                                                                                                                                                                             | PD6                                                                                                                                                                                                                                                                                                                                                | PD7                                                 |

|    |          |                                                                                                                                                                   |                                                                                                                                                                                                |                                                                                                                                                                                                                                                                                                                                                                                                                                                                                  |
|----|----------|-------------------------------------------------------------------------------------------------------------------------------------------------------------------|------------------------------------------------------------------------------------------------------------------------------------------------------------------------------------------------|----------------------------------------------------------------------------------------------------------------------------------------------------------------------------------------------------------------------------------------------------------------------------------------------------------------------------------------------------------------------------------------------------------------------------------------------------------------------------------|
|    | SN<br>V  | LRP1B , <u>HOXA10-HOXA9</u> , <u>NCOR2</u> , <u>FGFR3</u> , <u>PTPRT</u> ,<br>EDC4 , PTPRT , ZFH3 (c.8780G>C) , ZFH3<br>(c.2556C>G) , <u>BRAF</u> , <u>PABPC1</u> | LRP1B , <u>HOXA10-HOXA9</u> , <u>NCOR2</u> , <u>FGFR3</u> , <u>PTPRT</u> , EDC4 ,<br>PTPRT , ZFH3 (c.8780G>C) , ZFH3 (c.2556C>G) , <u>BRAF</u> ,<br><u>PABPC1</u> , <u>SPEN</u> , <u>LRRK2</u> | LRP1B , <u>HOXA10-HOXA9</u> , <u>NCOR2</u> , <u>FGFR3</u> , <u>PTPRT</u> ,<br><u>PTPRT</u> , EDC4 , PTPRT , ZFH3 (c.8780G>C) ,<br>ZFH3 (c.2556C>G) , <u>SPEN</u> , <u>LRRK2</u> , <u>ARID1A</u><br>(c.3091A>C) , <u>ARID1A</u> (c.3094G>C) , <u>KMT2D</u><br>(c.9370G>A) , <u>KMT2D</u> (c.5875G>A) , <u>DICER1</u><br>, <u>SETD2</u> , <u>LRRK2</u> , <u>ARID1A</u> (c.3098A>T) ,<br><u>HACE1</u> (c.49C>A) , <u>HACE1</u> (c.40T>G) ,<br><u>HACE1</u> (c.28C>G) , <u>KMT2A</u> |
|    | CN<br>V  | gain 1q, +3, gain 4q, +5, gain 6p, +7, gain 9p, gain<br>15q, gain 17q (partial), +19, +21 (partial), loss 4p,<br>loss 13q, loss 14q, -18                          | gain 1q, +3, gain 4q, +5, gain 6p, +7, gain 9p, gain 15q,<br>gain 17q (partial), +19, +21 (partial), loss 4p, loss 13q,<br>loss 14q, -18                                                       | gain 1q, gain 6p (partial), gain 16p                                                                                                                                                                                                                                                                                                                                                                                                                                             |
|    | FIS<br>H | t(4;14)                                                                                                                                                           | No data available                                                                                                                                                                              | t(4;14)                                                                                                                                                                                                                                                                                                                                                                                                                                                                          |
| 31 |          | PD4                                                                                                                                                               | PD5                                                                                                                                                                                            | PD6                                                                                                                                                                                                                                                                                                                                                                                                                                                                              |
|    |          | LRP1B , IRF4 , SYNE1 , FAT4 , CDKN2A , LRRK2 , CYLD<br>,                                                                                                          | LRP1B , IRF4 , SYNE1 , FAT4 , CDKN2A , LRRK2 , CYLD ,<br><u>DNAH11</u>                                                                                                                         | LRP1B , IRF4 , SYNE1 , FAT4 , CDKN2A ,<br>LRRK2 , CYLD , <u>DNAH11</u>                                                                                                                                                                                                                                                                                                                                                                                                           |
|    |          | gain 1q, gain 2p (partial), gain 6p, gain 6q (partial),<br>gain 8q, loss 6q (partial), loss 14q, loss 18q                                                         | gain 2p (partial), gain 6p, gain 8q, gain 15q, loss 6q<br>(partial), loss 8p, loss 13q, loss 14q                                                                                               | gain 1q, gain 6p, gain 6q (partial), gain 8q,<br>gain 9q, loss 6q (partial), loss 13q, loss 14q                                                                                                                                                                                                                                                                                                                                                                                  |
|    |          | No detectable 14q32 translocations                                                                                                                                | No detectable 14q32 translocations                                                                                                                                                             | No data available                                                                                                                                                                                                                                                                                                                                                                                                                                                                |
| 32 |          | PD7                                                                                                                                                               | PD8                                                                                                                                                                                            |                                                                                                                                                                                                                                                                                                                                                                                                                                                                                  |
|    |          | PRDM9 , PABPC1 , ARID2 , <u>RYR1</u> , CSMD3                                                                                                                      | PRDM9 , PABPC1 , ARID2 , <u>RYR1</u> , CSMD3                                                                                                                                                   | -                                                                                                                                                                                                                                                                                                                                                                                                                                                                                |
|    |          | gain 1q21, +6, +7, gain 15q, +19, loss 13q                                                                                                                        | +3, +5, +6, +7, +11, gain 15q, +19, loss 13q, loss 22q                                                                                                                                         | -                                                                                                                                                                                                                                                                                                                                                                                                                                                                                |
|    |          | No detectable 14q32 translocations                                                                                                                                | No detectable 14q32 translocations                                                                                                                                                             | -                                                                                                                                                                                                                                                                                                                                                                                                                                                                                |
| 33 |          | PD1                                                                                                                                                               | PD3                                                                                                                                                                                            |                                                                                                                                                                                                                                                                                                                                                                                                                                                                                  |
|    |          | KRAS , ZFH3 , TCF3 , SHANK2 , LRP1B (c.3075T>G) ,<br>MAST4 , <u>DNAH5</u>                                                                                         | KRAS , ZFH3 , TCF3 , SHANK2 , LRP1B (c.3075T>G) ,<br>MAST4 , <u>DNAH5</u> , <u>ATR</u> , <u>RYR2</u> , EDC4 , LRP1B (c.3058C>A) ,<br><u>SOX9</u> , <u>ARID1A</u> , <u>NCOR2</u>                | -                                                                                                                                                                                                                                                                                                                                                                                                                                                                                |
|    |          | +5 (partial), gain 6p22.1, gain 9q, +11, gain 15q,<br>+19, gain 21q, loss 1p, loss 13q                                                                            | gain 1q21, gain 2p (partial), +5, gain 6p22.1, +9, +11, gain<br>15q, +19, +21 (partial), loss 2p (partial), loss 17q (partial)                                                                 | -                                                                                                                                                                                                                                                                                                                                                                                                                                                                                |
|    |          | No detectable 14q32 translocations                                                                                                                                | No detectable 14q32 translocations                                                                                                                                                             |                                                                                                                                                                                                                                                                                                                                                                                                                                                                                  |

Description: In orange, blue and white are SNVs/CNVs acquired, lost and unchanged over time, respectively.

SNVs present in at least two samples with variant allele frequency of at least 40% are underlined. Abbreviations:

b, biochemical progression; CNV, copy number variants; FISH; fluorescence in-situ hybridization; PDn, nth disease progression; SNV, single nucleotide variants.
