# Supplementary material for: Tracking Clonal Evolution of Multiple Myeloma Using Targeted Next-Generation DNA Sequencing
Source: MDPI journal article supplement (doi:10.3390/biomedicines10071674), 2022-07-12

Figure S1. Evolution of single nucleotide variants during multiple myeloma progression in patients with more than two samples collected.

Abbreviations: B, biochemical; C, clinical; ND, new diagnosis; P, patient; R, relapse.

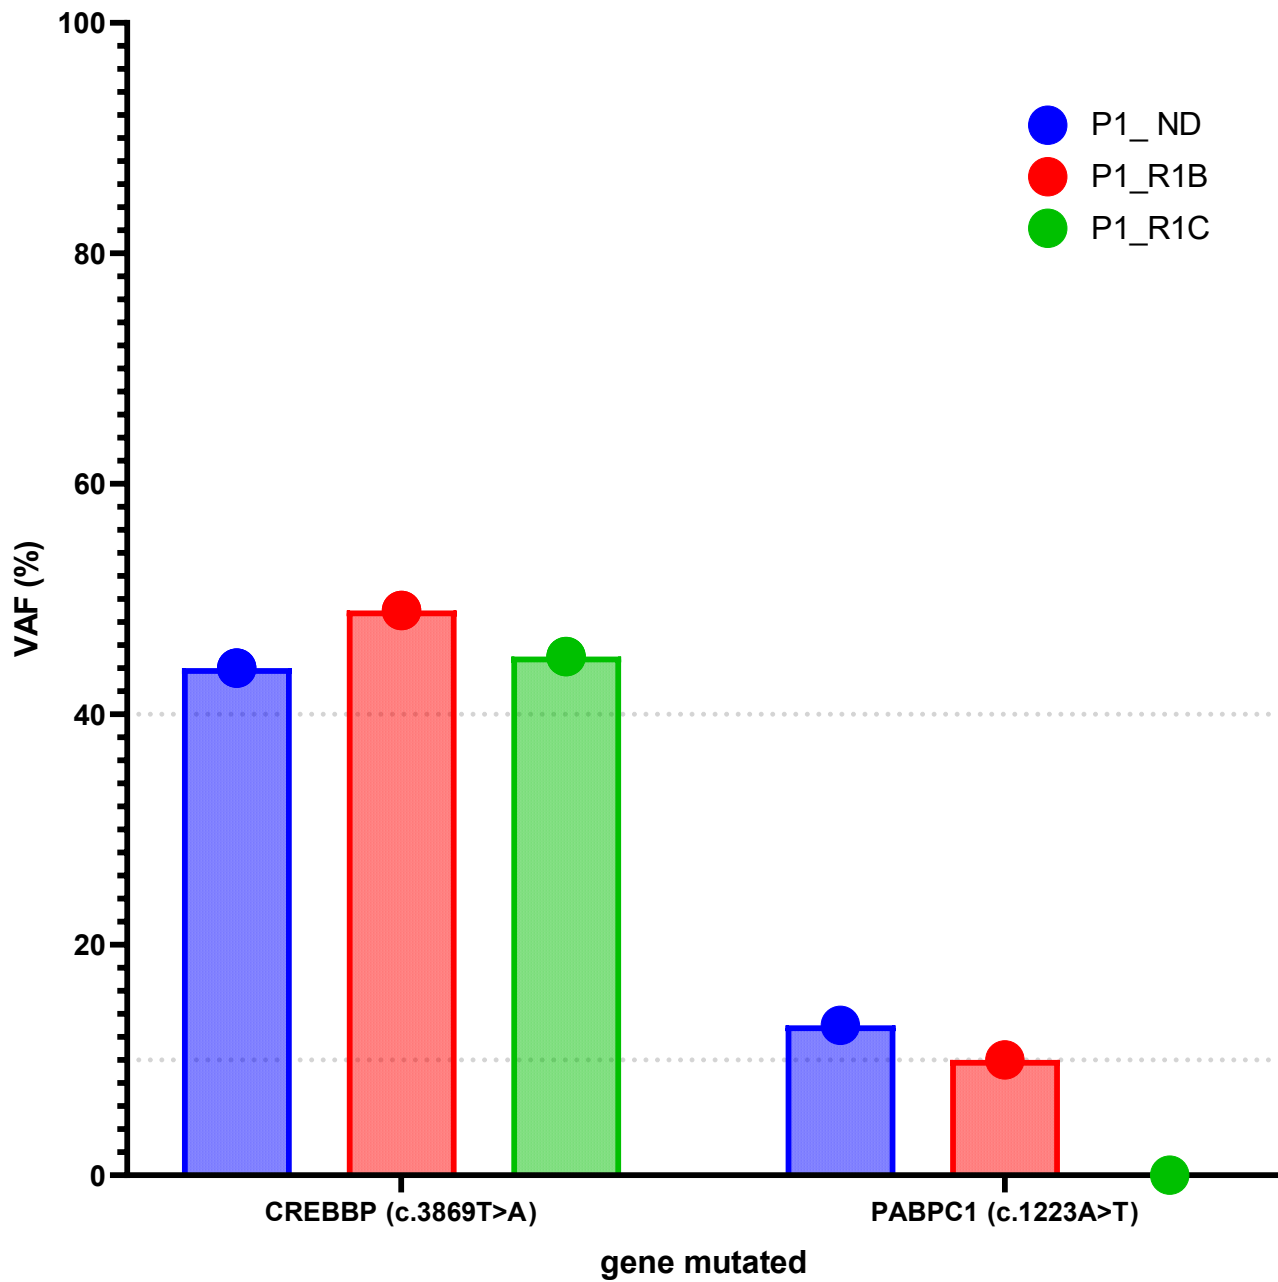

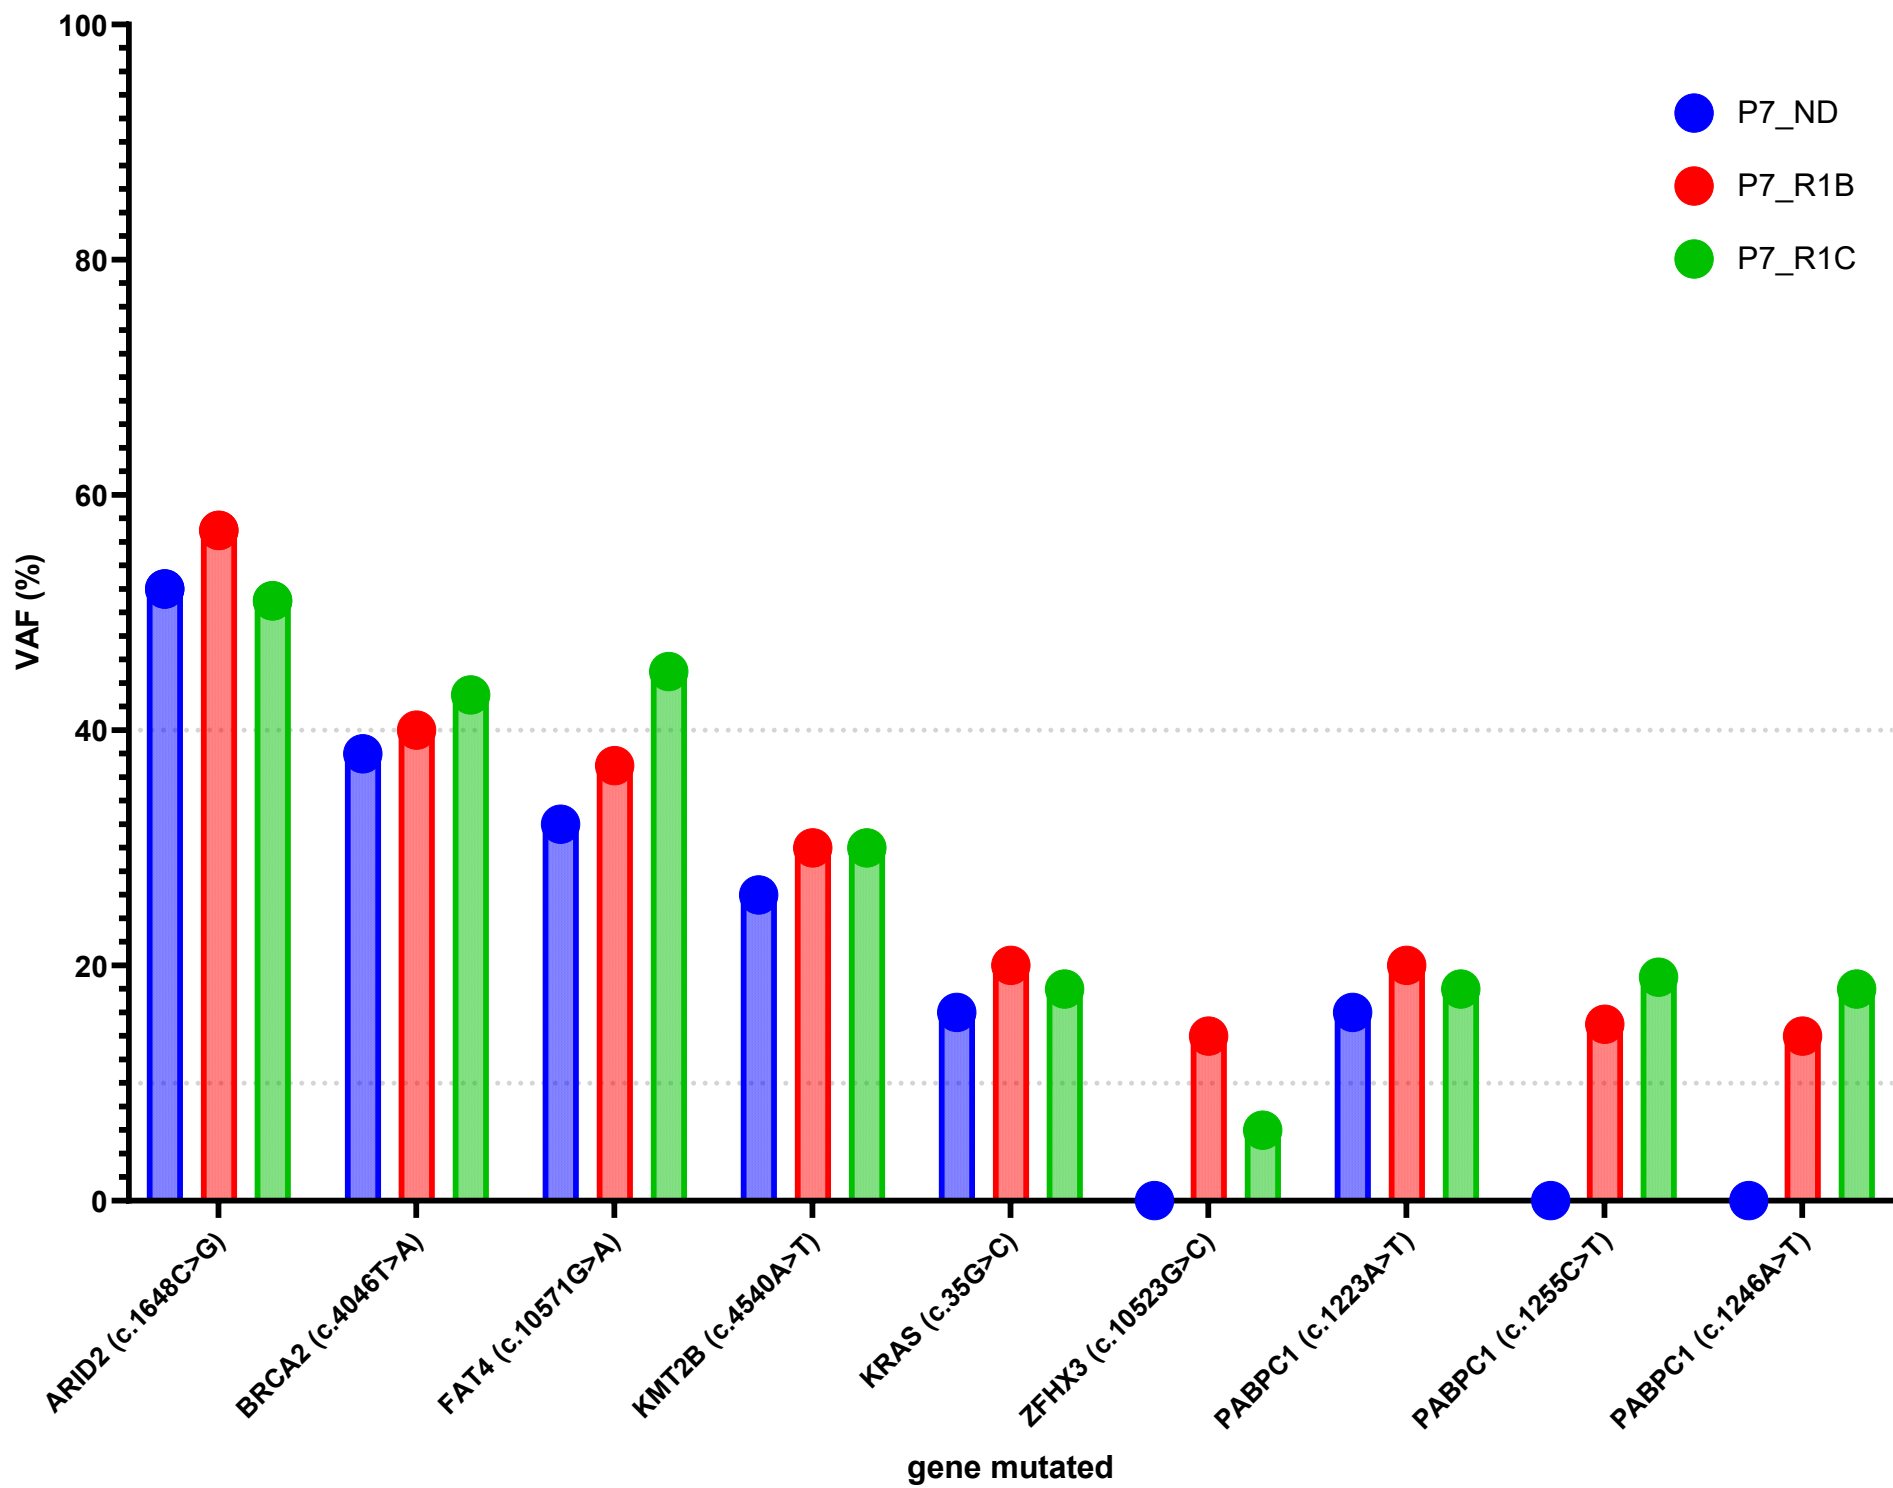

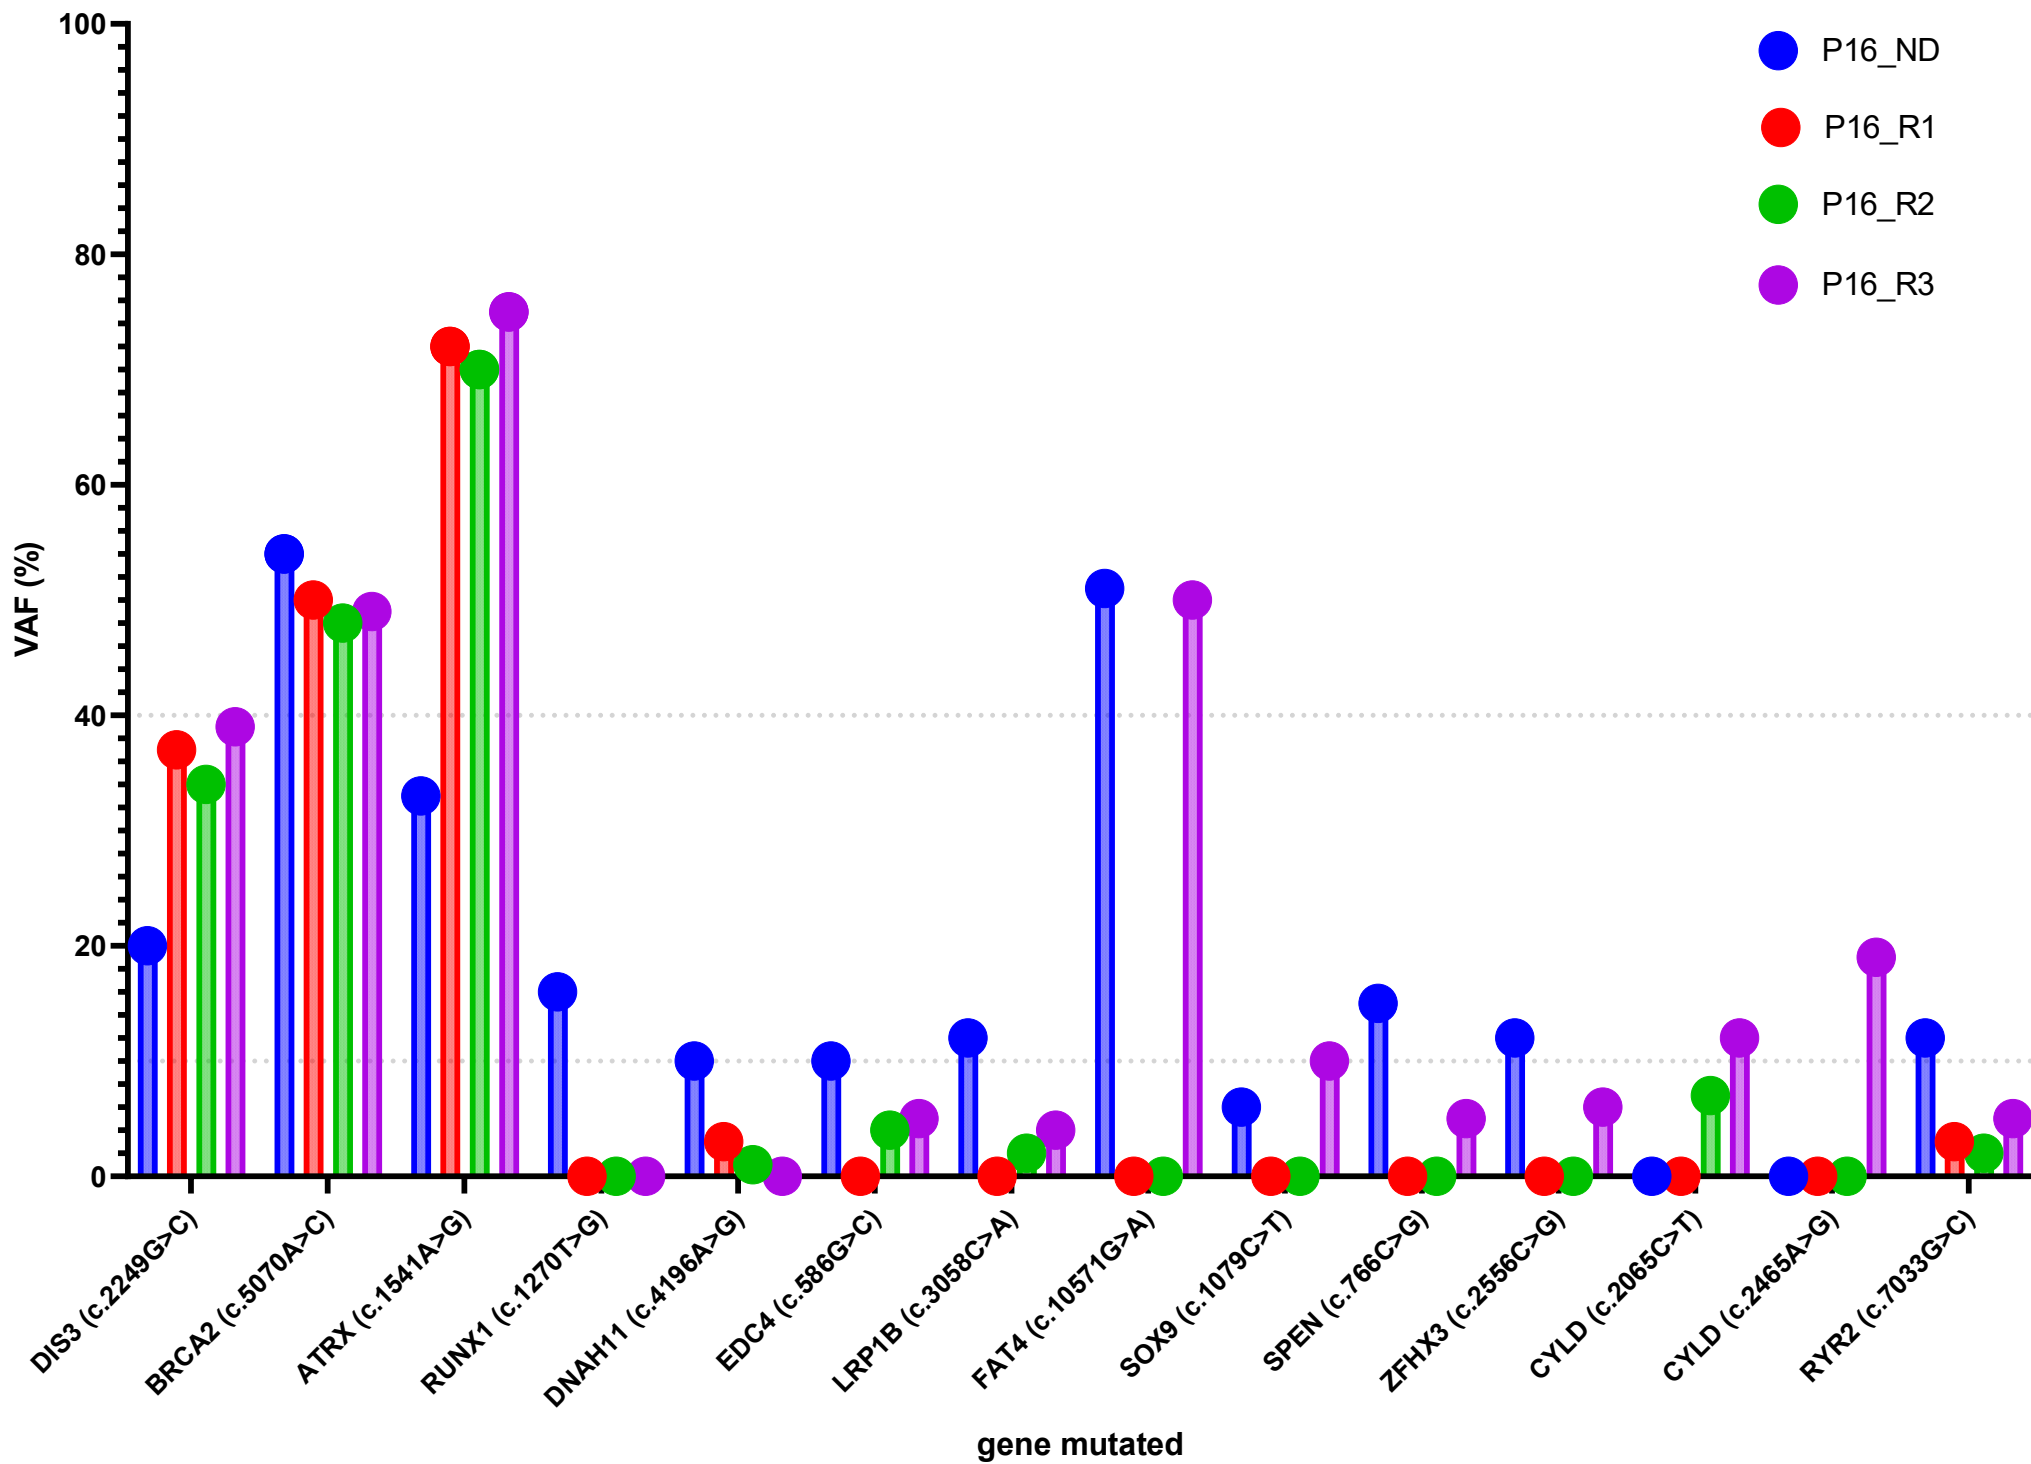

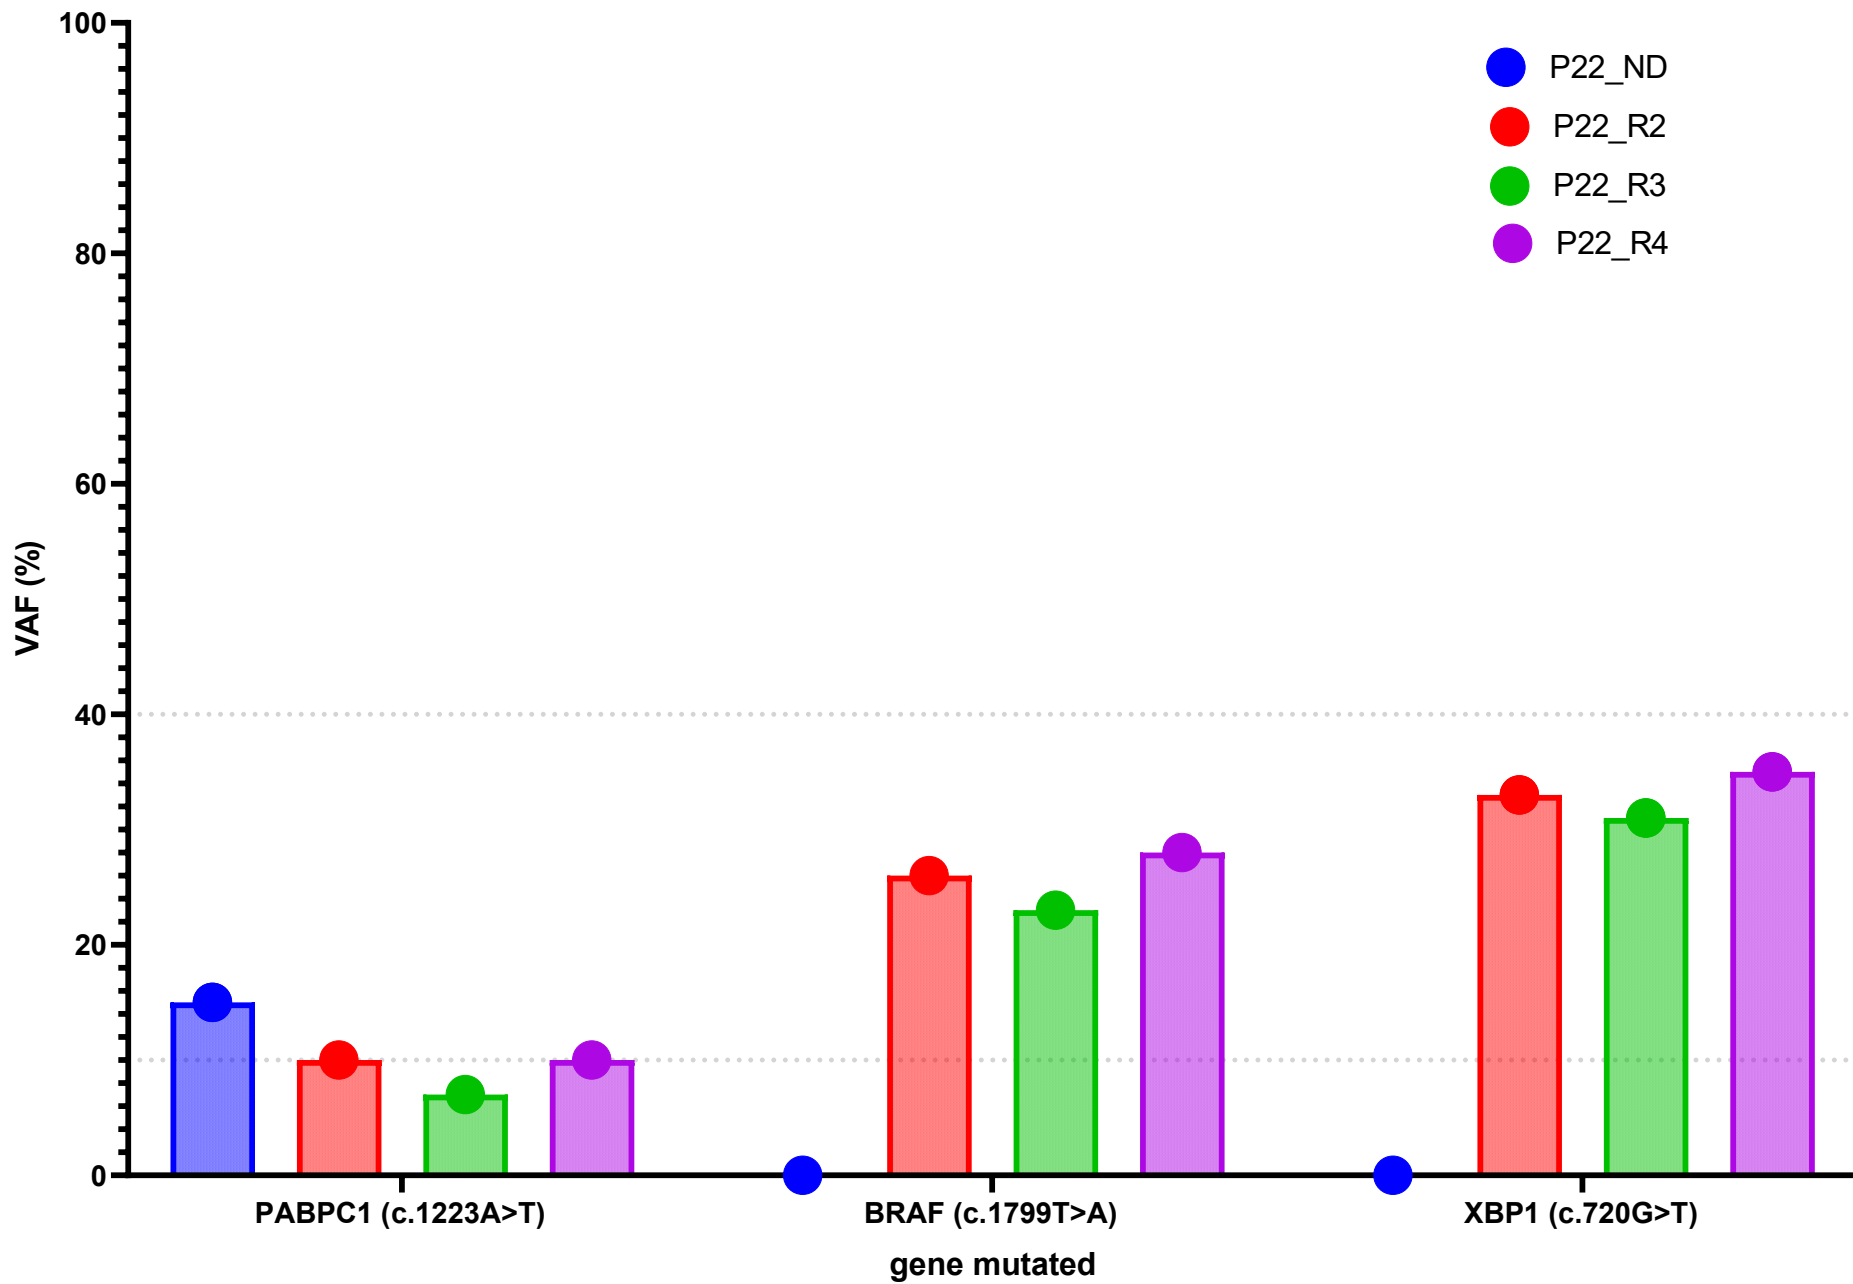

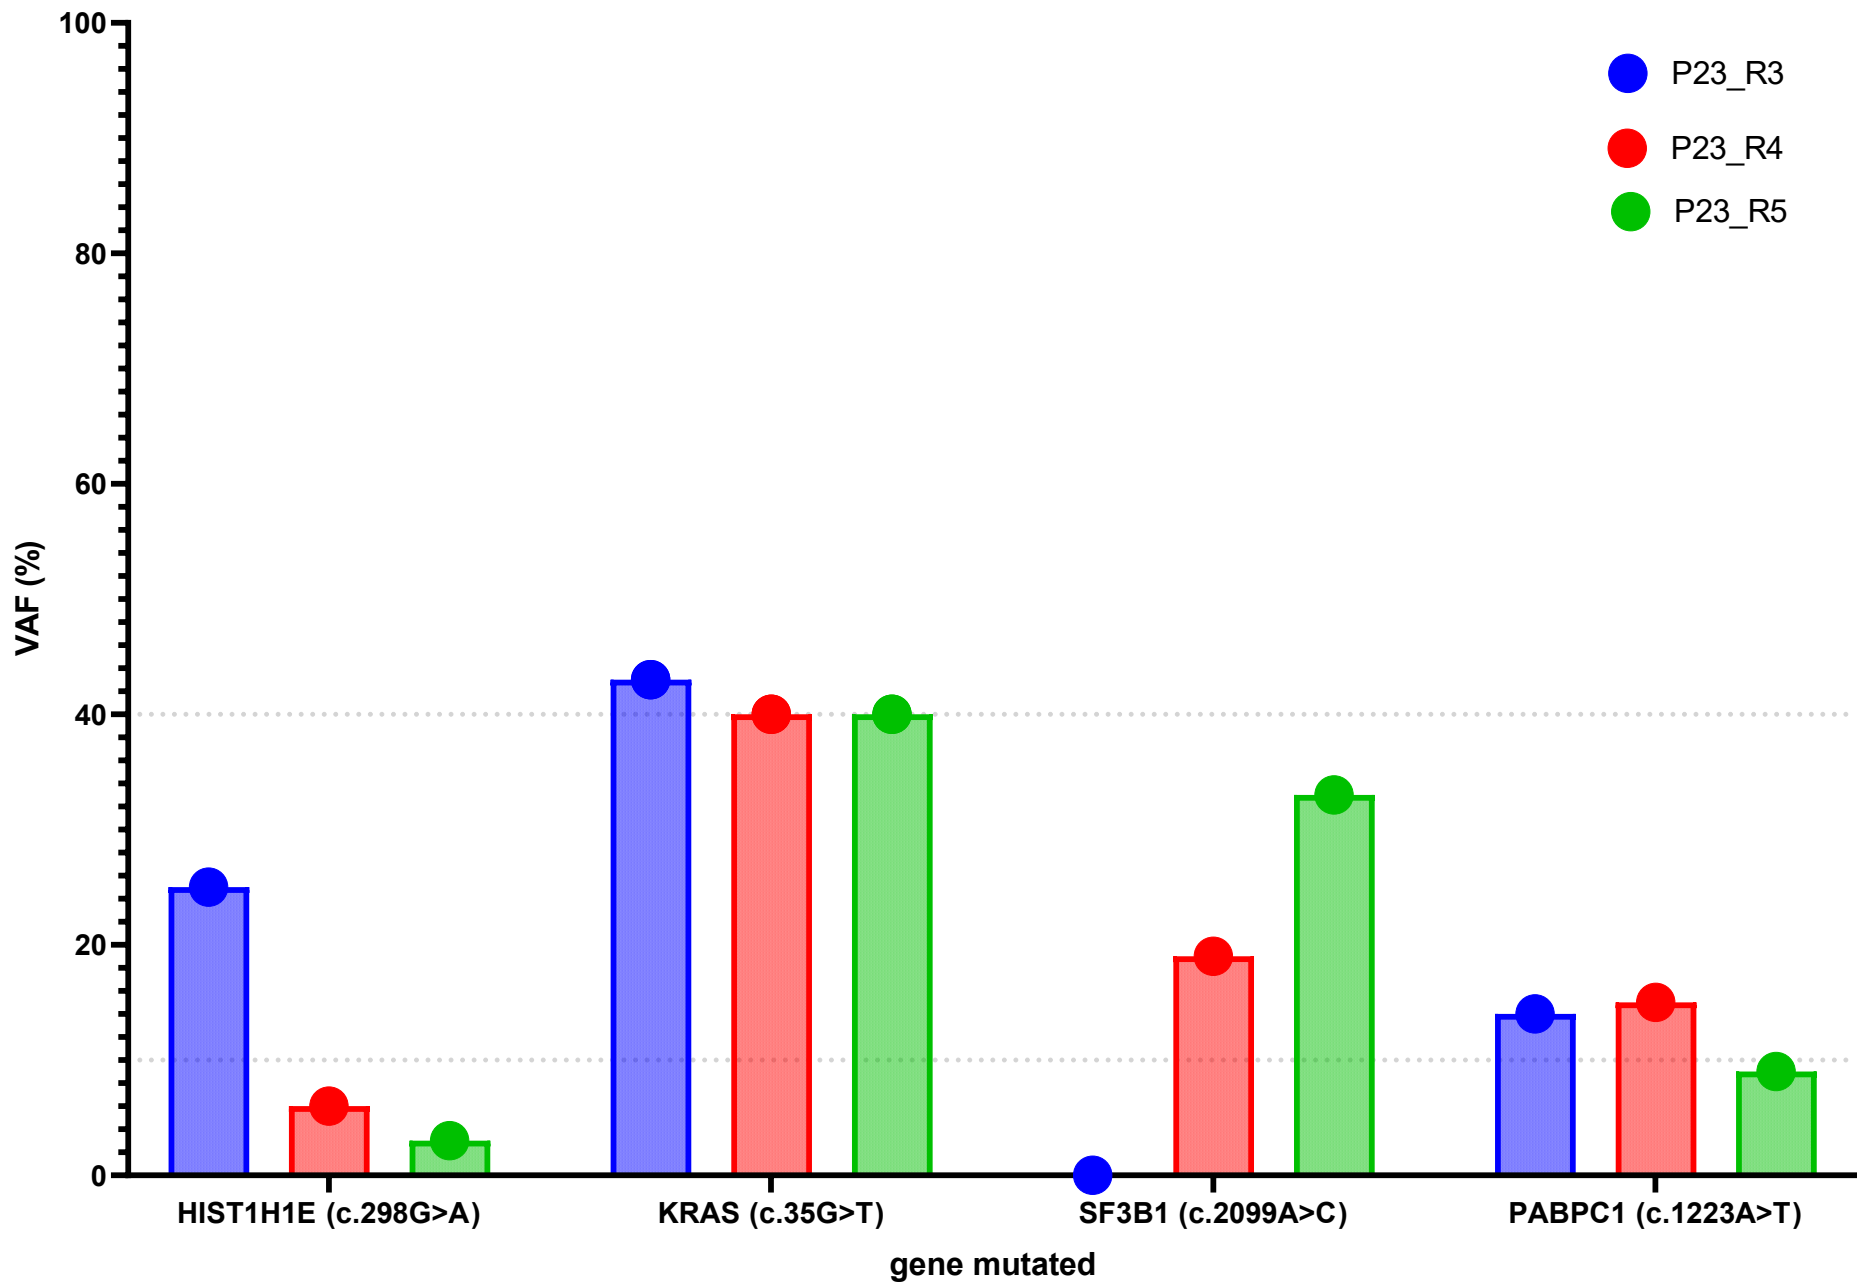

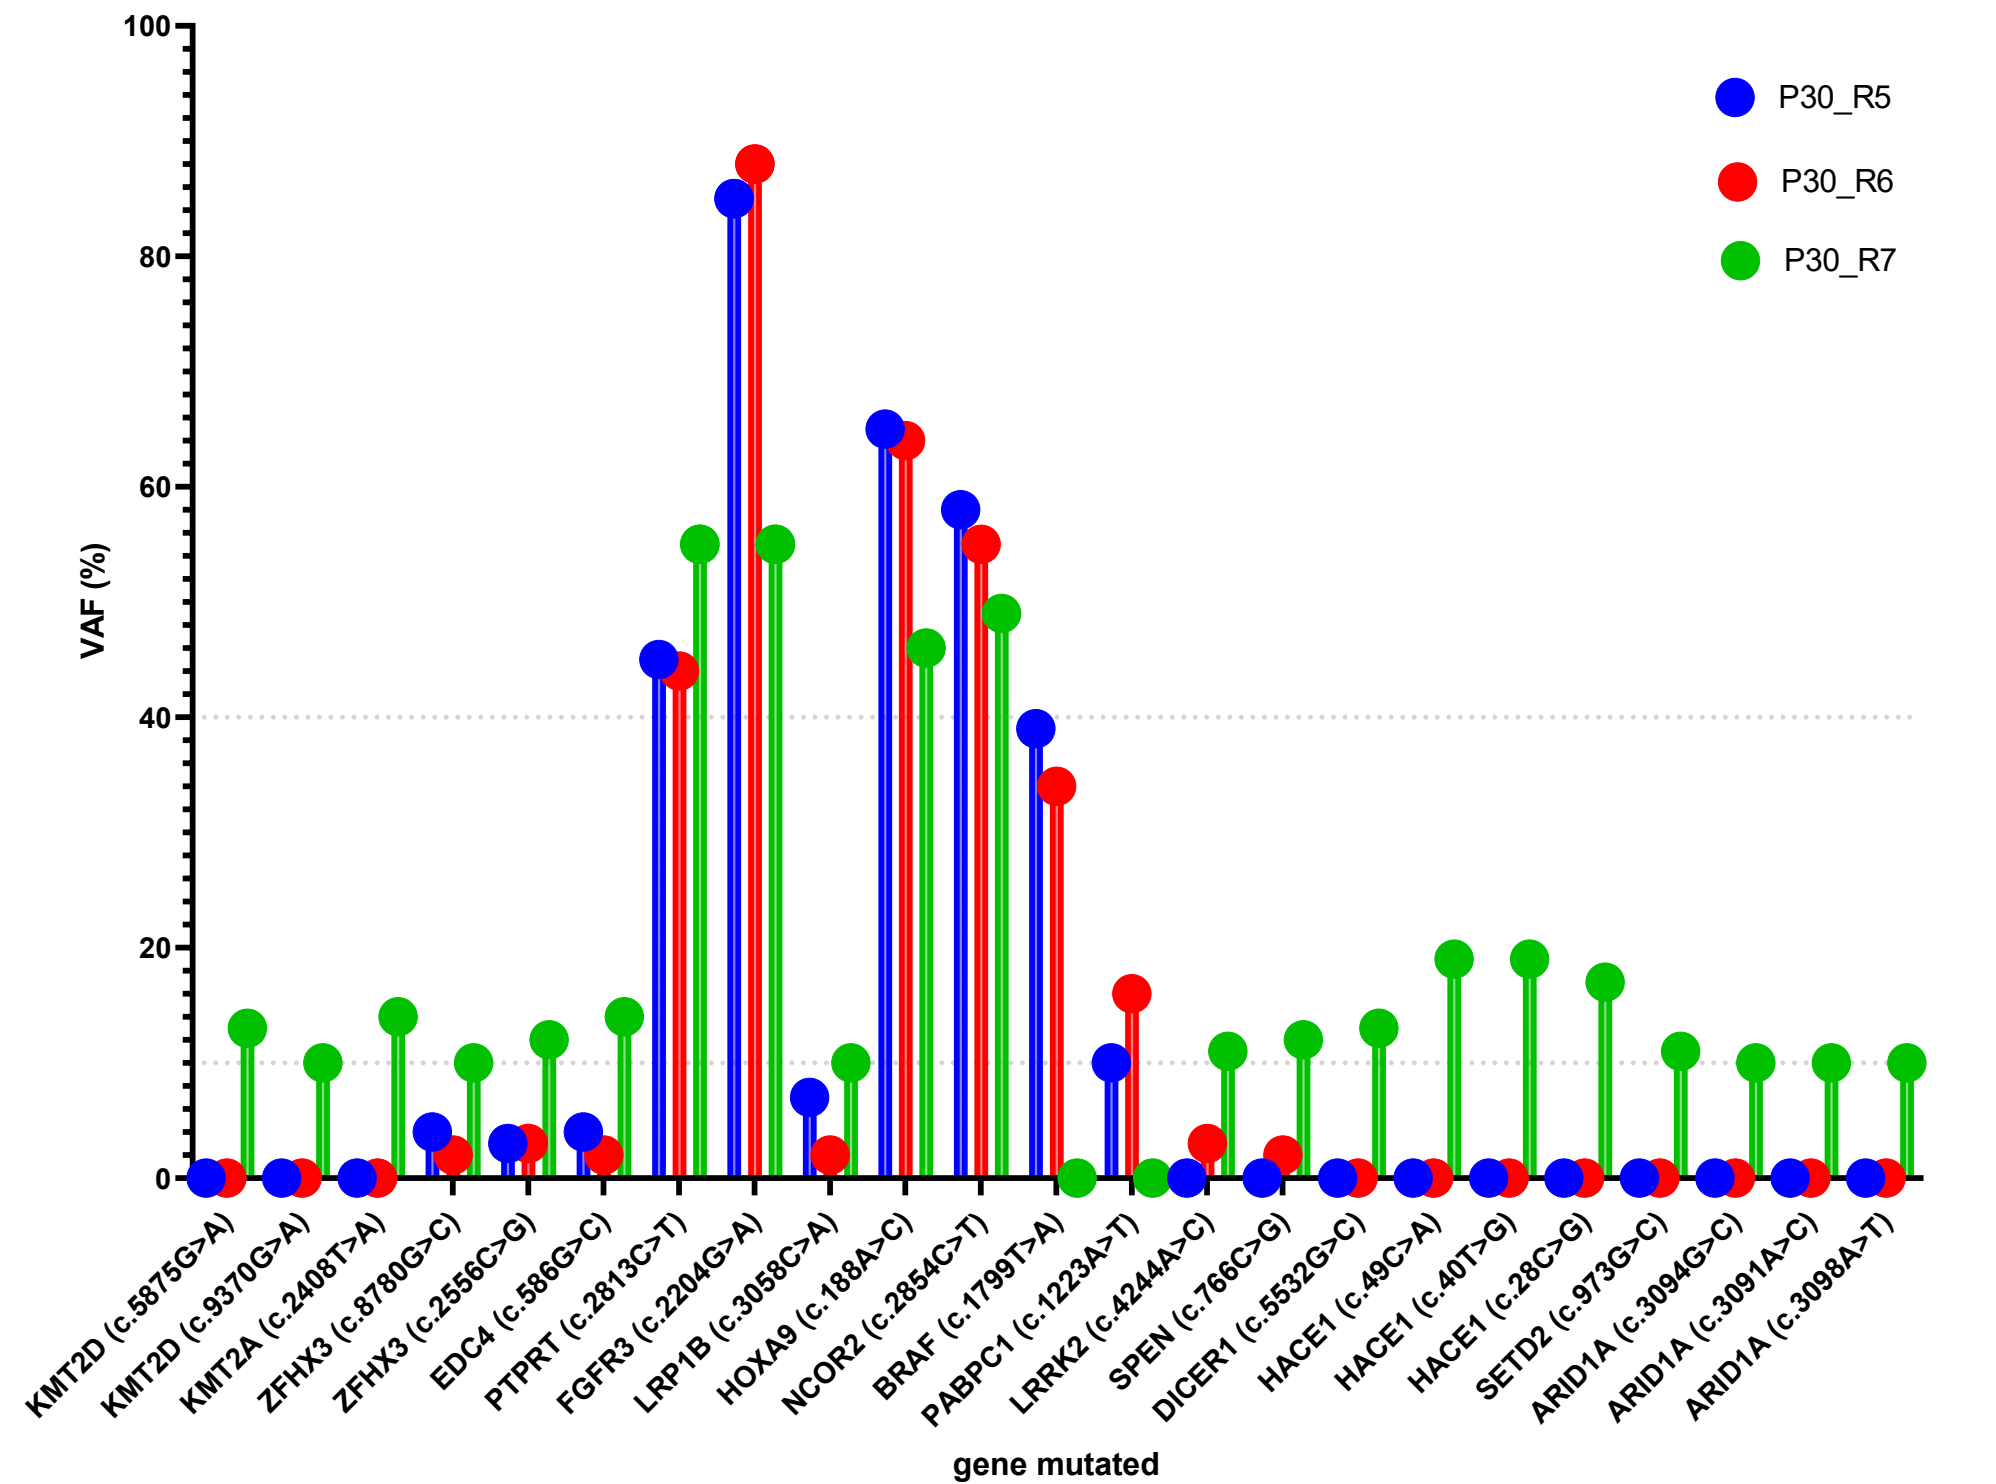

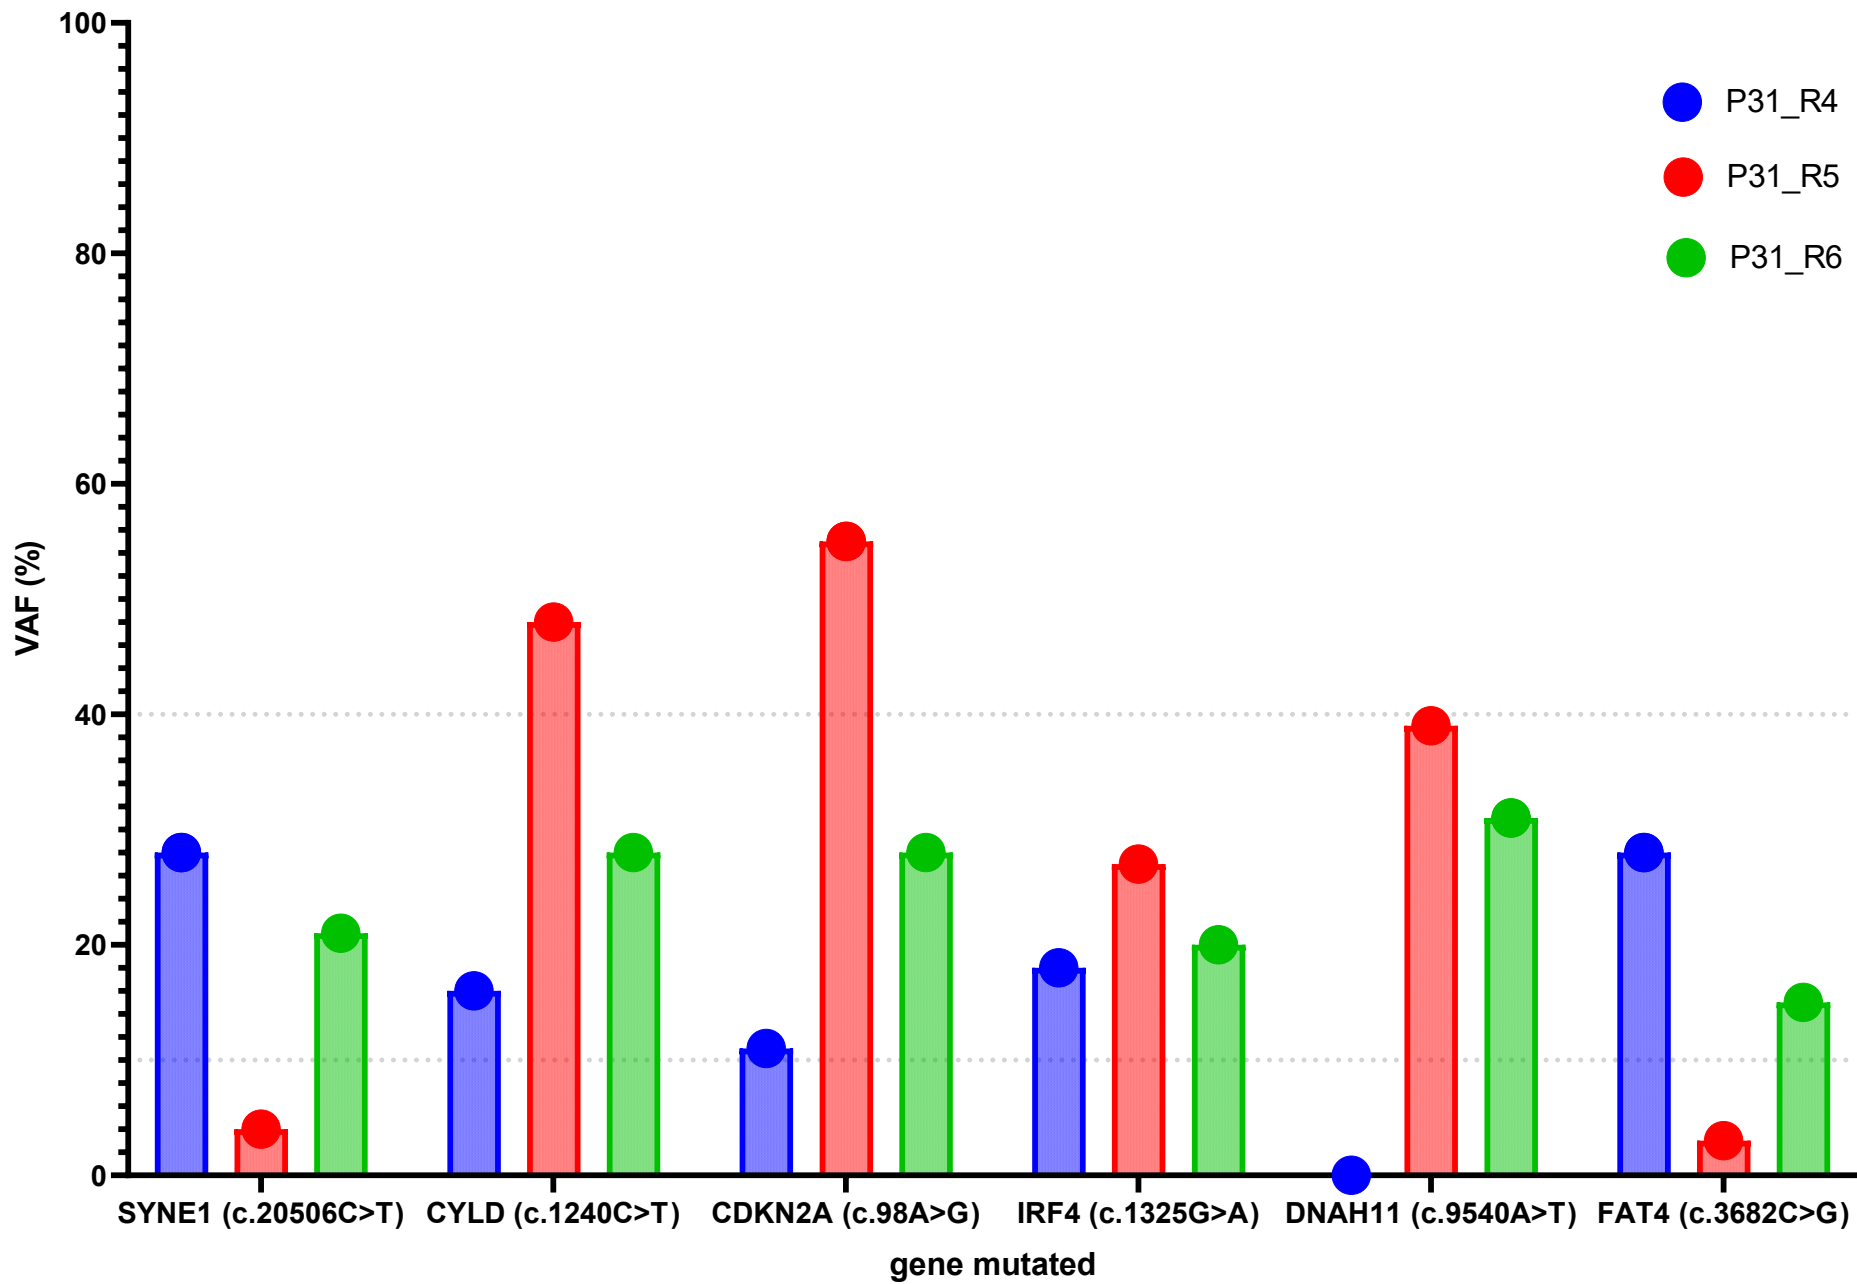

Supplement: s1 [file s1]
