# Supplementary material for: Tracking Clonal Evolution of Multiple Myeloma Using Targeted Next-Generation DNA Sequencing
Source: MDPI journal article supplement (doi:10.3390/biomedicines10071674), 2022-07-12

Figure S2. Prognostic significance of clinical risk factors in the study cohort. The comparison of survival groups was assessed by log rank test (*p* values).

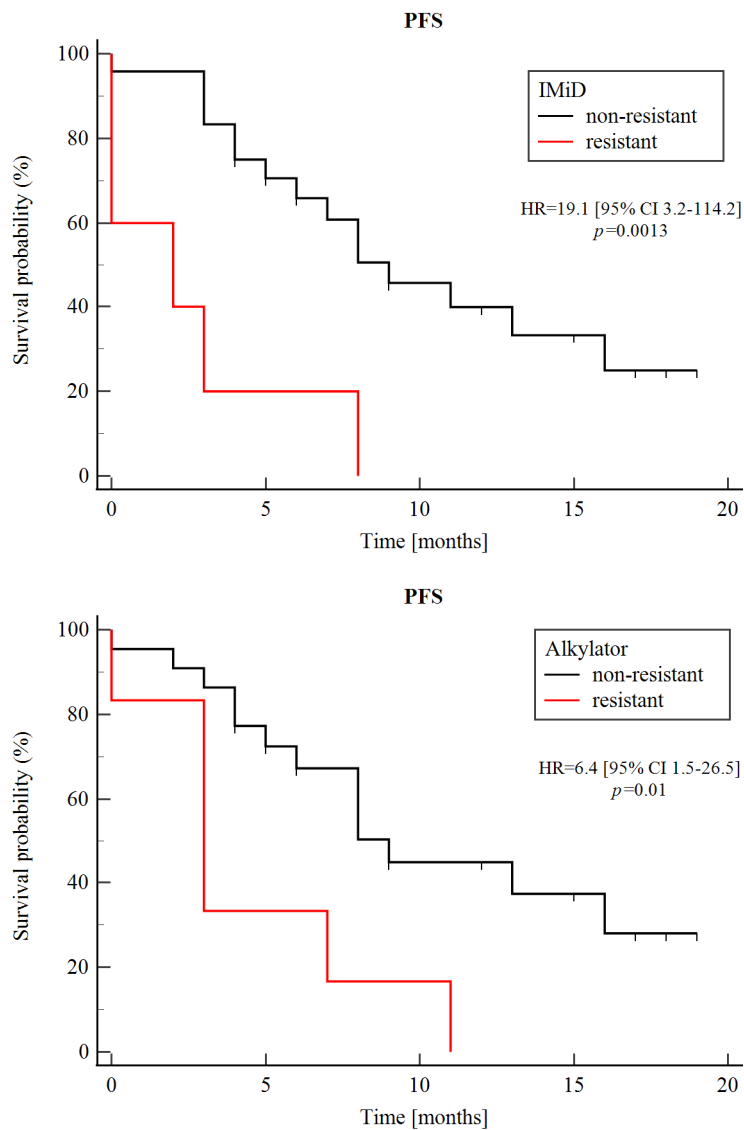

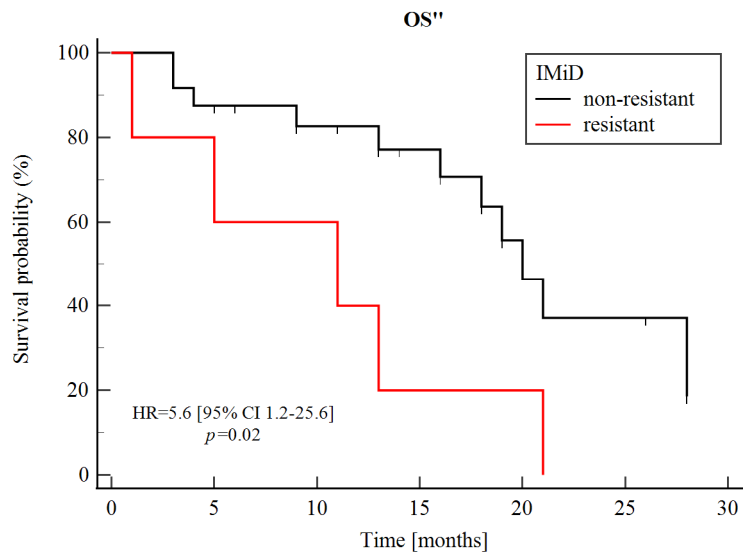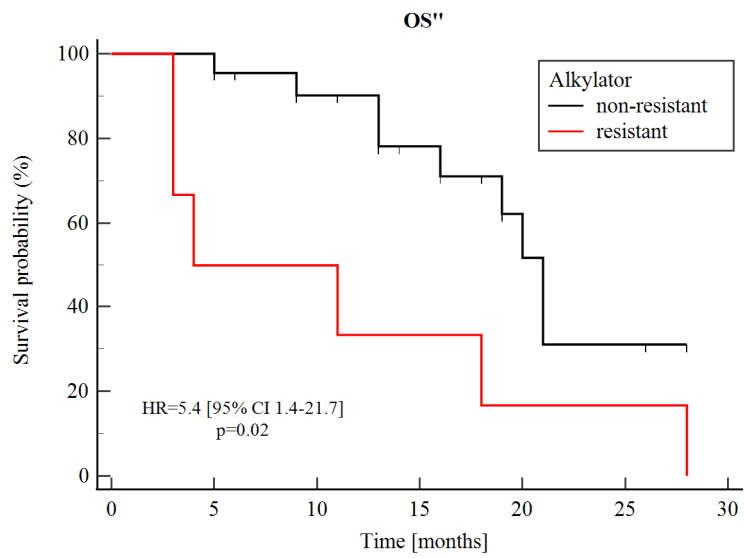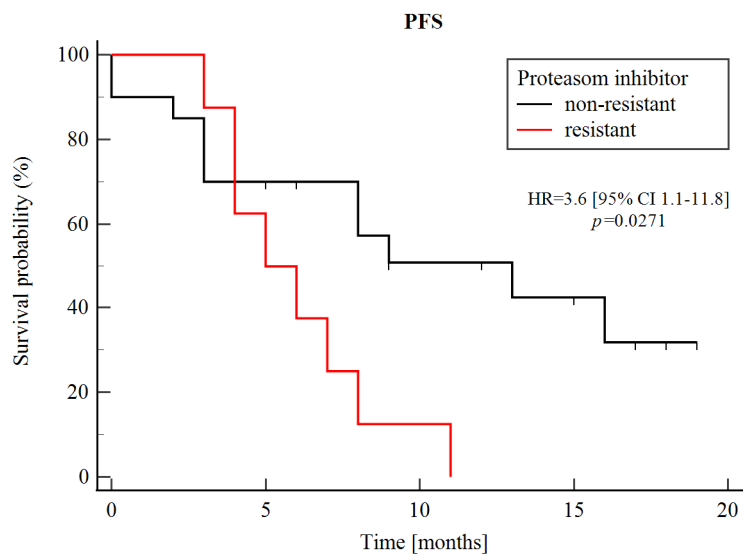

Supplement: s1 [file s1]
