# Supplementary material for: Tracking Clonal Evolution of Multiple Myeloma Using Targeted Next-Generation DNA Sequencing
Source: Biomedicines. 2022 Jul 12;10(7):1674. doi: 10.3390/biomedicines10071674 (PMC9313382; doi:10.3390/biomedicines10071674)
Supplement: Supplementary file 1 [file biomedicines-10-01674-s001.zip › Table S1.xlsx]

## Sheet: Arkusz1
Table S1. Gene panel
	A	B	C	D	E	F	G	H	I	J	K	L	M	N	O	P	R	S	T	U	V	W	X	Y	Z
	ABCF1	BAX	C8orf34	DDB1	EBI3	FANCA	GATA6	HDAC2	ID3	JAK3	KDM5A	LEMD2	MAF	NBPF1	ORC6	PABPC1	RAD18	SAMHD1	TANK	U2AF1	VEGFA	WWOX	XBP1	YAP1	ZFHX3
	ABCA13	BCL2	C8orf86	DDX11	EDC4	FANCD2	GNAS	HIST1H1C	IDH1	JARID2	KDM5B	LRP1B	MAFB	NCOR1	OSMR	PAK2	RAG2	SAXO2	TBX3	U2AF2		WT1	XPO1		ZFHX4
	ACTG1	BCL6	CALCB	DDX3X	EGFR	FANCG	GPC5	HIST1H1E	IDH2		KDM5C	LRRK2	MAGED1	NCOR2		PANK3	RASA2	SETD2	TCF3	UBE2D3					ZFP36L1
	ADAM29	BCMA	CAND1	DICER1	EGR1	FAT1	GPR180	HIST1H4H	IFNG		KDM5D	LTA	MAML2	NEB		PAX5	RB1	SF3B1	TENM1	UBE2G1					ZNF292
	ADAMTS10	BCOR	CARD9	DIS3	EIF4G2	FAT2		HIST2H3C	IGF1R		KDM6A	LTB	MAN2C1	NF1		PBRM1	RBX1	SGPP1	TENT5C	UBE2M					ZRSR2
	ADAR	BIRC2	CASP8	DNAH11	EMSY	FAT3		HMCN1	IGF2R		KDM6B	LTBR	MAP2K2	NFE2L2		PCLO	RET	SHANK2	TET2	UBR5
	ADGRV1	BIRC3	CBL	DNAH5	EP300	FAT4		HOXA9	IKBKB		KDR		MAP2K4	NFKB1		PDCD1LG2	RFTN1	SMAD3	TGDS	ULBP1
	AHNAK2	BIRC5	CCl2	DNAH9	EP400	FBXW7		HOXB3	IKZF1		KIF22		MAP3K1	NFKB2		PDGFRB	RNF213	SMARCB1	TGFB1	ULBP2
	AKT1	BLM	CCL3	DNMT3A	EPAS1	FGFR1		HRAS	IKZF3		KLHL6		MAP3K14	NFKBIA		PEG3	ROBO1	SMURF1	TGFBR2	USH2A
	ALK	BMP2K	CCL5	DNMT3B	EPHA3	FGFR3		HUWE1	IL10		KMT2A		MAP3K4	NOS2		PI4KA	ROBO2	SNX7	TNF	USP29
	ALOX15	BRAF	CCND1	DPYD	ERBB3	FLG			IL12A		KMT2B		MAP3K9	NOTCH1		PIK3C2G	ROS1	SOX21	TNFSF11	USP7
	ANKLE1	BRCA1	CCND2	DTX1	ERN1	FLT1			IL15		KMT2C		MAP4K4	NOTCH2		PIK3CA	RPL11	SOX9	TNIK	USP9X
	APC	BRCA2	CCND3	DUSP2	ETV1	FLT3			IL17A		KMT2D		MAPK9	NOTCH3		PIK3CB	RPL5	SP140	TNS3
	ARID1A	BRIP1	CD200		ETV6	FOXA2			IL2		KMT2E		MAST4	NOTCH4		PIK3R6	RPN1	SPEN	TOP1
	ARID1B	BTK	CD27		EZH2	FOXP1			IL6		KRAS		MAX	NR3C1		PIM1	RPS3A	SPOP	TP53
	ARID2	BUB1B	CD274			FRG1BP			IRF4				MDM2	NRAS		PIM2	RUNX1	SRSF1	TPRG1
	ARID3A		CD38			FUBP1							MDM4	NSD2		PIM3	RUNX2	SRSF2	TRAF2
	ARID3B		CD40										MECOM	NTRK2		PKHD1	RYR1	ST6GAL1	TRAF3
	ARID3C		CD47										MED12	NXF1		PLCE1	RYR2	STAG2	TSC1
	ARID4A		CD55										MGA			PMS1	RYR3	STAT3	TSC2
	ARID4B		CD59										MLH1			PNRC1		STAT6	TSHZ1
	ARID5A		CD79A										MPEG1			POT1		SYNE1	TSHZ3
	ARID5B		CD79B										MPL			PPM1D			TSKU
	ASAP2		CD96										MRE11			PPP6C
	ASXL1		CDC73										MSH3			PRDM1
	ATAD5		CDK4										MUC16			PRDM9
	ATF7IP		CDK6										MUTYH			PRKD2
	ATM		CDKN1B										MYC			PSMB5
	ATP13A2		CDKN2A										MYCN			PSMG2
	ATP13A4		CDKN2C										MYD88			PSPC1
	ATP2A1		CHD8													PTEN
	ATP2A2		CIC													PTPA
	ATP2A3		CNOT3													PTPN11
	ATR		COBLL1													PTPRD
	ATRX		COL2A1													PTPRK
			COPS5													PTPRT
			CRBN													PTPRZ1
			CREBBP													PVR
			CSF2
			CSMD1
			CSMD3
			CUL4A
			CUL4B
			CXCL8
			CXCR4
			CYLD
