# Supplementary material for: Tracking Clonal Evolution of Multiple Myeloma Using Targeted Next-Generation DNA Sequencing
Source: Biomedicines. 2022 Jul 12;10(7):1674. doi: 10.3390/biomedicines10071674 (PMC9313382; doi:10.3390/biomedicines10071674)
Supplement: Supplementary file 1 [file biomedicines-10-01674-s001.zip › Table S2.xlsx]

## Sheet: table S2
Table S2. Summary of identified gene variants.
Patient_ID	Transcript_ID:cDNA	Gen_ID	cDNA	protein	ACMG classification according to Varsome [1]	Gene druggability according to the TARGET database [2]	Gene druggability according to the OnkoKB database [3]	VAF_S1 [%]	S1_description	VAF_S2 [%]	S2_description	VAF_S3 [%]	S3_description	VAF_S4 [%]	S4_description
1	ENST00000318607.9:c.1223A>T	PABPC1	c.1223A>T	Y408F	uncertain significance	no	not provided	13	diagnosis	10	relapse_1_biochem	0	relapse_1_clinical
1	ENST00000262367.9:c.3869T>A	CREBBP	c.3869T>A	M1290K	likely pathogenic	no	no	44	diagnosis	49	relapse_1_biochem	45	relapse_1_clinical
2	ENST00000256078.8:c.38G>A	KRAS	c.38G>A	G13D	pathogenic	yes	yes	38	diagnosis	45	relapse_1
2	ENST00000355710.7:c.3112A>G	RET	c.3112A>G	T1038A	uncertain significance/pathogenic	yes	not provided	45	diagnosis	49	relapse_1
2	ENST00000262662.5:c.103A>C	CDKN2C	c.103A>C	N35H	uncertain significance/pathogenic	no	no	15	diagnosis	0	relapse_1
3	ENST00000646891.1:c.1780G>A	BRAF	c.1780G>A	D594N	pathogenic	yes	yes	24	diagnosis	27	relapse_1_biochem
3	ENST00000389301.7:c.737G>A	FANCA	c.737G>A	G246E	uncertain significance	no	no	47	diagnosis	47	relapse_1_biochem
3	ENST00000389484.7:c.4174C>A	LRP1B	c.4174C>A	L1392I	uncertain significance	no	not provided	19	diagnosis	0	relapse_1_biochem
4	ENST00000256078.8:c.180_181TC>AA	KRAS	c.180_181TC>AA	Q61K	pathogenic	yes	yes	43	diagnosis	47	relapse_1
4	ENST00000257430.8:c.2678A>T	APC	c.2678A>T	E893V	uncertain significance/pathogenic	yes	no	64	diagnosis	66	relapse_1
4	ENST00000458205.6:c.1241T>C	MLH1	c.1241T>C	I414T	pathogenic	no	no	40	diagnosis	39	relapse_1
4	ENST00000318607.9:c.1223A>T	PABPC1	c.1223A>T	Y408F	uncertain significance	no	not provided	14	diagnosis	0	relapse_1
5	ENST00000262189.10:c.1173C>A	KMT2C	c.1173C>A	C391*	benign [*]	no	no	0	diagnosis	10	relapse_1
5	ENST00000256078.8:c.35G>A	KRAS	c.35G>A	G12D	pathogenic	yes	yes	55	diagnosis	59	relapse_1
5	ENST00000527670.5:c.23C>T	JAK3	c.23C>T	T8M	uncertain significance	yes	no	38	diagnosis	44	relapse_1
5	ENST00000646673.1:c.959G>A	SAMHD1	c.959G>A	C320Y	uncertain significance/pathogenic	no	no	11	diagnosis	19	relapse_1
5	ENST00000265104.4:c.962C>T	DNAH5	c.962C>T	S321L	uncertain significance/pathogenic	no	not provided	52	diagnosis	49	relapse_1
5	ENST00000318607.9:c.1223A>T	PABPC1	c.1223A>T	Y408F	uncertain significance	no	not provided	17	diagnosis	0	relapse_1
6	ENST00000366574.6:c.4444C>T	RYR2	c.4444C>T	R1482C	uncertain significance	no	not provided	51	diagnosis	46	relapse_1_biochem
6	ENST00000405201.5:c.2462T>G	NCOR2	c.2462T>G	V821G	uncertain significance	no	no	12	diagnosis	0	relapse_1_biochem
6	ENST00000256078.8:c.437C>T	KRAS	c.437C>T	A146V	pathogenic	yes	yes	0	diagnosis	10	relapse_1_biochem
6	ENST00000389484.7:c.5392G>A	LRP1B	c.5392G>A	A1798T	uncertain significance	no	not provided	0	diagnosis	27	relapse_1_biochem
6	ENST00000318607.9:c.1223A>T	PABPC1	c.1223A>T	Y408F	uncertain significance	no	not provided	0	diagnosis	10	relapse_1_biochem
6	ENST00000366603.6:c.913T>C	ARID4B	c.913T>C	F305L	uncertain significance	no	no	38	diagnosis	44	relapse_1_biochem
7	ENST00000420124.2:c.4540A>T	KMT2B	c.4540A>T	K1514*	pathogenic	no	no	26	diagnosis	30	relapse_1_biochem	30	relapse_1_clinical
7	ENST00000256078.8:c.35G>C	KRAS	c.35G>C	G12A	pathogenic	yes	yes	32	diagnosis	37	relapse_1_biochem	45	relapse_1_clinical
7	ENST00000380152.7:c.4046T>A	BRCA2	c.4046T>A	I1349N	uncertain significance	yes	yes	38	diagnosis	40	relapse_1_biochem	43	relapse_1_clinical
7	ENST00000318607.9:c.1223A>T	PABPC1	c.1223A>T	Y408F	uncertain significance	no	not provided	16	diagnosis	20	relapse_1_biochem	18	relapse_1_clinical
7	ENST00000318607.9:c.1255C>T	PABPC1	c.1255C>T	R419C	uncertain significance	no	not provided	0	diagnosis	15	relapse_1_biochem	19	relapse_1_clinical
7	ENST00000318607.9:c.1246A>T	PABPC1	c.1246A>T	T416S	uncertain significance/pathogenic	no	not provided	0	diagnosis	14	relapse_1_biochem	18	relapse_1_clinical
7	ENST00000641206.2:c.10523G>C	ZFHX3	c.10523G>C	G3508A	uncertain significance	no	no	0	diagnosis	14	relapse_1_biochem	6	relapse_1_clinical
7	ENST00000394329.7:c.10571G>A	FAT4	c.10571G>A	G3524D	uncertain significance	no	not provided	0	diagnosis	0	relapse_1_biochem	95	relapse_1_clinical
7	ENST00000334344.10:c.1648C>G	ARID2	c.1648C>G	L550V	uncertain significance	no	no	52	diagnosis	57	relapse_1_biochem	51	relapse_1_clinical
8	ENST00000263253.8:c.736A>G	EP300	c.736A>G	M246V	uncertain significance	no	no	91	diagnosis	96	relapse_1
8	ENST00000349155.6:c.1607T>G	TBX3	c.1607T>G	L536R	uncertain significance	no	no	45	diagnosis	63	relapse_1
8	ENST00000396340.1:c.180G>A	CDKN1B	c.180G>A	W60*	pathogenic	yes	no	89	diagnosis	97	relapse_1
8	ENST00000256646.6:c.2113C>T	NOTCH2	c.2113C>T	R705C	uncertain significance	yes	no	43	diagnosis	44	relapse_1
8	ENST00000318607.9:c.1223A>T	PABPC1	c.1223A>T	Y408F	uncertain significance	no	not provided	11	diagnosis	0	relapse_1
10	ENST00000301067.11:c.9370G>A	KMT2D	c.9370G>A	E3124K	uncertain significance	no	no	10	diagnosis	2	relapse_1
10	ENST00000366574.6:c.7033G>C	RYR2	c.7033G>C	A2345P	uncertain significance	no	not provided	11	diagnosis	4	relapse_1
10	ENST00000358933.9:c.586G>C	EDC4	c.586G>C	D196H	uncertain significance/pathogenic	no	not provided	11	diagnosis	4	relapse_1
10	ENST00000350721.8:c.7375C>A	ATR	c.7375C>A	R2459S	uncertain significance/pathogenic	yes	no	13	diagnosis	1	relapse_1
10	ENST00000256078.8:c.182A>T	KRAS	c.182A>T	Q61L	pathogenic	yes	yes	8	diagnosis	46	relapse_1
10	ENST00000394329.7:c.10571G>A	FAT4	c.10571G>A	G3524D	uncertain significance	no	not provided	47	diagnosis	65	relapse_1
10	ENST00000344686.6:c.1382A>G	MAP3K14	c.1382A>G	E461G	uncertain significance/pathogenic	no	no	51	diagnosis	46	relapse_1
10	ENST00000342160.7:c.10835A>T	HUWE1	c.10835A>T	D3612V	uncertain significance	no	not provided	11	diagnosis	0	relapse_1
10	ENST00000389484.7:c.3058C>A	LRP1B	c.3058C>A	P1020T	uncertain significance/pathogenic	no	not provided	10	diagnosis	0	relapse_1
10	ENST00000389484.7:c.3075T>G	LRP1B	c.3075T>G	C1025W	uncertain significance	no	not provided	10.1266	diagnosis	0	relapse_1
10	ENST00000563622.5:c.1636G>A	MAN2C1	c.1636G>A	G546R	uncertain significance	no	no	10	diagnosis	0	relapse_1
10	ENST00000405201.5:c.2462T>G	NCOR2	c.2462T>G	V821G	uncertain significance	no	no	11.4943	diagnosis	0	relapse_1
10	ENST00000641206.2:c.10523G>C	ZFHX3	c.10523G>C	G3508A	uncertain significance	no	no	11	diagnosis	0	relapse_1
10	ENST00000457599.6:c.2390G>C	ARID1A	c.2390G>C	G797A	uncertain significance/pathogenic	no	yes	10	diagnosis	2	relapse_1
10	ENST00000641206.2:c.10520G>C	ZFHX3	c.10520G>C	G3507A	uncertain significance	no	no	11.0656	diagnosis	0	relapse_1
10	ENST00000263253.8:c.1089G>C	EP300	c.1089G>C	Q363H	uncertain significance	no	no	12.1005	diagnosis	0	relapse_1
12	ENST00000398568.6:c.327G>T	CYLD	c.327G>T	R109S	uncertain significance/pathogenic	no	no	3	diagnosis	13	relapse_1_biochem
12	ENST00000366574.6:c.1396C>G	RYR2	c.1396C>G	P466A	uncertain significance	no	not provided	53	diagnosis	50	relapse_1_biochem
12	ENST00000641206.2:c.10523G>C	ZFHX3	c.10523G>C	G3508A	uncertain significance	no	no	0	diagnosis	15	relapse_1_biochem
13	ENST00000256078.8:c.40G>A	KRAS	c.40G>A	V14I	pathogenic	yes	yes	42	diagnosis	19	relapse_1
13	ENST00000371085.7:c.761A>G	GNAS	c.761A>G	N254S	pathogenic	yes	no	47	diagnosis	25	relapse_1
13	ENST00000372470.8:c.1666G>T	MPL	c.1666G>T	V556F	uncertain significance	yes	no	5	diagnosis	33	relapse_1
13	ENST00000318607.9:c.1223A>T	PABPC1	c.1223A>T	Y408F	uncertain significance	no	not provided	15	diagnosis	0	relapse_1
13	ENST00000245479.2:c.1079C>T	SOX9	c.1079C>T	P360L	uncertain significance	no	no	0	diagnosis	12	relapse_1
14	ENST00000261822.4:c.85C>G	BCL7A	c.85C>G	R29G	uncertain significance	no	no	48	diagnosis	54	relapse_1
14	ENST00000343805.10:c.1052G>A	SP140	c.1052G>A	R351H	nie ma	no	no	54	diagnosis	51	relapse_1
14	ENST00000370768.6:c.1124G>T	FUBP1	c.1124G>T	G375V	uncertain significance	no	no	38.8535	diagnosis	0	relapse_1
14	ENST00000277120.7:c.958A>C	NTRK2	c.958A>C	N320H	uncertain significance	no	not provided	37.2483	diagnosis	0	relapse_1
14	ENST00000269305.8:c.818G>A	TP53	c.818G>A	R273H	pathogenic	yes	no	51	diagnosis	0	relapse_1
14	ENST00000350721.8:c.7375C>A	ATR	c.7375C>A	R2459S	uncertain significance/pathogenic	yes	no	0	diagnosis	11	relapse_1
14	ENST00000269305.8:c.711G>A	TP53	c.711G>A	M237I	pathogenic	yes	no	0	diagnosis	94	relapse_1
14	ENST00000369577.7:c.3391A>T	ZNF292	c.3391A>T	K1131*	pathogenic	no	not provided	0	diagnosis	12	relapse_1
14	ENST00000399788.6:c.53A>C	KDM5A	c.53A>C	E18A	uncertain significance/pathogenic	no	no	0	diagnosis	10	relapse_1
17	ENST00000389048.7:c.2743T>G	ALK	c.2743T>G	W915G	uncertain significance	yes	yes	6	diagnosis	10	relapse_3
17	ENST00000265104.4:c.8845C>G	DNAH5	c.8845C>G	p.Q2949E	uncertain significance	no	not provided	50	diagnosis	50	relapse_3
17	ENST00000341319.7:c.368T>C	KLHL6	c.368T>C	M123T	uncertain significance/pathogenic	no	not provided	37	diagnosis	32	relapse_3
18	ENST00000256078.8:c.182A>T	KRAS	c.182A>T	Q61L	pathogenic	yes	yes	39	diagnosis	35	relapse_2
18	ENST00000318607.9:c.1240C>T	PABPC1	c.1240C>T	P414S	uncertain significance/pathogenic	no	not provided	0	diagnosis	10	relapse_2
18	ENST00000318607.9:c.1223A>T	PABPC1	c.1223A>T	Y408F	uncertain significance	no	not provided	0	diagnosis	17	relapse_2
19	ENST00000239938.4:c.95A>T	EGR1	c.95A>T	Y32F	uncertain significance	no	no	64	diagnosis	65	relapse_3
19	ENST00000297405.9:c.10209G>C	CSMD3	c.10209G>C	Q3403H	uncertain significance	no	not provided	43	diagnosis	51	relapse_3
19	ENST00000256078.8:c.180_181TC>AA	KRAS	c.180_181TC>AA	Q61K	pathogenic	yes	yes	0	diagnosis	46	relapse_3
20	ENST00000409114.7:c.1990C>T	PBRM1	c.1990C>T	P664S	uncertain significance/pathogenic	no	no	0	diagnosis	55	relapse_3
20	ENST00000239938.4:c.109G>C	EGR1	c.109G>C	E37Q	uncertain significance/pathogenic	no	no	29	diagnosis	44	relapse_3
20	ENST00000298910.11:c.4802A>T	LRRK2	c.4802A>T	K1601M	uncertain significance	no	not provided	28.1787	diagnosis	48.3536	relapse_3
20	ENST00000377780.8:c.1054C>T	DIS3	c.1054C>T	R352*	uncertain significance	no	no	40	diagnosis	0	relapse_3
20	ENST00000256078.8:c.183A>T	KRAS	c.183A>T	Q61H	pathogenic	yes	yes	22	diagnosis	0	relapse_3
20	ENST00000221972.7:c.95C>G	CD79A	c.95C>G	A32G	uncertain significance	no	no	0	diagnosis	10	relapse_3
21	ENST00000380013.8:c.1841G>A	TET2	c.1841G>A	G614E	uncertain significance/pathogenic	no	no	4	diagnosis	13	relapse_3
21	ENST00000366574.6:c.7033G>C	RYR2	c.7033G>C	A2345P	uncertain significance	no	not provided	2	diagnosis	15	relapse_3
21	ENST00000641206.2:c.8780G>C	ZFHX3	c.8780G>C	S2927T	uncertain significance	no	no	4	diagnosis	12	relapse_3
21	ENST00000641206.2:c.2556C>G	ZFHX3	c.2556C>G	S852R	uncertain significance	no	no	3	diagnosis	13	relapse_3
21	ENST00000296682.3:c.829G>A	PRDM9	c.829G>A	E277K	uncertain significance	no	not provided	0	diagnosis	11	relapse_3
21	ENST00000526495.5:c.5532G>C	DICER1	c.5532G>C	K1844N	uncertain significance	no	no	2	diagnosis	10	relapse_3
21	ENST00000326195.12:c.1540G>A	ABCF1	c.1540G>A	V514I	uncertain significance/pathogenic	no	no	3	diagnosis	10	relapse_3
21	ENST00000256078.8:c.35G>A	KRAS	c.35G>A	G12D	pathogenic	yes	yes	39	diagnosis	9	relapse_3
21	ENST00000344686.6:c.1660G>T	MAP3K14	c.1660G>T	D554Y	uncertain significance	no	no	53	diagnosis	50	relapse_3
21	ENST00000318607.9:c.1223A>T	PABPC1	c.1223A>T	Y408F	uncertain significance	no	not provided	13	diagnosis	0	relapse_3
21	ENST00000389048.7:c.4279T>C	ALK	c.4279T>C	S1427P	uncertain significance	yes	yes	0	diagnosis	10.034	relapse_3
21	ENST00000526148.5:c.581C>T	EIF4G2	c.581C>T	P194L	uncertain significance/pathogenic	no	no	0	diagnosis	10.9467	relapse_3
21	ENST00000394329.7:c.10571G>A	FAT4	c.10571G>A	G3524D	uncertain significance	no	not provided	0	diagnosis	50	relapse_3
21	ENST00000342160.7:c.707C>T	HUWE1	c.707C>T	P236L	uncertain significance/pathogenic	no	not provided	0	diagnosis	10	relapse_3
21	ENST00000301067.11:c.5875G>A	KMT2D	c.5875G>A	G1959R	uncertain significance	no	no	0	diagnosis	16	relapse_3
21	ENST00000369966.7:c.2363A>T	NFKB2	c.2363A>T	Q788L	uncertain significance	no	not provided	0	diagnosis	10	relapse_3
21	ENST00000263388.6:c.795G>C	NOTCH3	c.795G>C	E265D	uncertain significance/pathogenic	no	no	0	diagnosis	13	relapse_3
21	ENST00000300305.7:c.1270T>G	RUNX1	c.1270T>G	S424A	uncertain significance/pathogenic	no	no	0	diagnosis	13	relapse_3
21	ENST00000359596.7:c.2513T>A	RYR1	c.2513T>A	L838Q	uncertain significance	no	not provided	0	diagnosis	10	relapse_3
21	ENST00000245479.2:c.1079C>T	SOX9	c.1079C>T	P360L	uncertain significance	no	no	0	diagnosis	21	relapse_3
21	ENST00000537215.6:c.1007T>C	STAT6	c.1007T>C	V336A	uncertain significance/pathogenic	no	no	0	diagnosis	10.0324	relapse_3
21	ENST00000269305.8:c.814G>A	TP53	c.814G>A	V272M	pathogenic	yes	no	0	diagnosis	14	relapse_3
21	ENST00000269305.8:c.550G>C	TP53	c.550G>C	D184H	likely pathogenic	yes	no	0	diagnosis	10	relapse_3
21	ENST00000521922.5:c.3001_3002GG>CC	UBR5	c.3001_3002GG>CC	G1001P	uncertain significance/pathogenic	no	no	0	diagnosis	12.8617	relapse_3
21	ENST00000420124.2:c.464A>T	KMT2B	c.464A>T	K155M	uncertain significance	no	no	0	diagnosis	10	relapse_3
21	ENST00000375401.7:c.1238T>G	KDM5C	c.1238T>G	V413G	likely pathogenic	no	no	0	diagnosis	11	relapse_3
21	ENST00000264709.7:c.2312G>A	DNMT3A	c.2312G>A	R771Q	pathogenic	yes	no	0	diagnosis	12	relapse_3
21	ENST00000457599.6:c.2397G>T	ARID1A	c.2397G>T	Q799H	uncertain significance	no	yes	6	diagnosis	10	relapse_3
21	ENST00000457599.6:c.2390G>C	ARID1A	c.2390G>C	G797A	uncertain significance/pathogenic	no	yes	5	diagnosis	12	relapse_3
21	ENST00000457599.6:c.4208T>G	ARID1A	c.4208T>G	V1403G	uncertain significance	no	yes	0	diagnosis	11	relapse_3
16	ENST00000366574.6:c.7033G>C	RYR2	c.7033G>C	A2345P	uncertain significance	no	not provided	12	diagnosis	3	relapse_1	2	relapse_2	5	relapse_3
16	ENST00000377780.8:c.2249G>C	DIS3	c.2249G>C	R750T	likely pathogenic	no	no	20	diagnosis	37	relapse_1	34	relapse_2	39	relapse_3
16	ENST00000380152.7:c.5070A>C	BRCA2	c.5070A>C	K1690N	likely pathogenic	yes	yes	54	diagnosis	50	relapse_1	48	relapse_2	49	relapse_3
16	ENST00000373344.9:c.1541A>G	ATRX	c.1541A>G	D514G	uncertain significance	no	no	33	diagnosis	72	relapse_1	70	relapse_2	75	relapse_3
16	ENST00000300305.7:c.1270T>G	RUNX1	c.1270T>G	S424A	uncertain significance/pathogenic	no	no	16	diagnosis	0	relapse_1	0	relapse_2	0	relapse_3
16	ENST00000409508.7:c.4196A>G	DNAH11	c.4196A>G	E1399G	uncertain significance/pathogenic	no	not provided	10	diagnosis	3	relapse_1	1	relapse_2	0	relapse_3
16	ENST00000358933.9:c.586G>C	EDC4	c.586G>C	D196H	uncertain significance/pathogenic	no	not provided	10	diagnosis	0	relapse_1	4	relapse_2	5	relapse_3
16	ENST00000389484.7:c.3058C>A	LRP1B	c.3058C>A	P1020T	uncertain significance/pathogenic	no	not provided	12	diagnosis	0	relapse_1	2	relapse_2	4	relapse_3
16	ENST00000394329.7:c.10571G>A	FAT4	c.10571G>A	G3524D	uncertain significance	no	not provided	51	diagnosis	0	relapse_1	0	relapse_2	50	relapse_3
16	ENST00000245479.2:c.1079C>T	SOX9	c.1079C>T	P360L	uncertain significance	no	no	6	diagnosis	0	relapse_1	0	relapse_2	10	relapse_3
16	ENST00000375759.7:c.766C>G	SPEN	c.766C>G	Q256E	uncertain significance/pathogenic	no	no	15	diagnosis	0	relapse_1	0	relapse_2	5	relapse_3
16	ENST00000641206.2:c.2556C>G	ZFHX3	c.2556C>G	S852R	uncertain significance	no	no	12	diagnosis	0	relapse_1	0	relapse_2	6	relapse_3
16	ENST00000398568.6:c.2065C>T	CYLD	c.2065C>T	H689Y	uncertain significance/pathogenic	no	no	0	diagnosis	0	relapse_1	7	relapse_2	12	relapse_3
16	ENST00000398568.6:c.2465A>G	CYLD	c.2465A>G	H822R	likely pathogenic	no	no	0	diagnosis	0	relapse_1	0	relapse_2	19	relapse_3
22	ENST00000318607.9:c.1223A>T	PABPC1	c.1223A>T	Y408F	uncertain significance	no	not provided	15	diagnosis	10	relapse_2	7	relapse_3	10	relapse_4
22	ENST00000646891.1:c.1799T>A	BRAF	c.1799T>A	V600E	pathogenic	yes	yes	0	diagnosis	26	relapse_2	23	relapse_3	28	relapse_4
22	ENST00000403532.7:c.720G>T	XBP1	c.720G>T	Q240H	not provided	no	no	0	diagnosis	33	relapse_2	31	relapse_3	35	relapse_4
23	ENST00000318607.9:c.1223A>T	PABPC1	c.1223A>T	Y408F	uncertain significance	no	not provided	14	relapse_3	15	relapse_4	9	relapse_5
23	ENST00000304218.5:c.298G>A	HIST1H1E	c.298G>A	G100S	uncertain significance/pathogenic	no	no	25	relapse_3	6	relapse_4	3	relapse_5
23	ENST00000256078.8:c.35G>T	KRAS	c.35G>T	G12V	pathogenic	yes	yes	43	relapse_3	40	relapse_4	40	relapse_5
23	ENST00000335508.10:c.2099A>C	SF3B1	c.2099A>C	K700T	pathogenic	no	yes	0	relapse_3	19	relapse_4	33	relapse_5
24	ENST00000452508.6:c.8161G>A	ATM	c.8161G>A	D2721N	uncertain significance/pathogenic	yes	yes	12	relapse_1	8	relapse_2
24	ENST00000398568.6:c.827G>A	CYLD	c.827G>A	W276*	pathogenic	no	no	57	relapse_1	24	relapse_2
24	ENST00000343677.3:c.5C>T	HIST1H1C	c.5C>T	S2F	uncertain significance	no	not provided	54	relapse_1	38	relapse_2
24	ENST00000536559.1:c.28G>A	CCND1	c.28G>A	V10M	uncertain significance	yes	no	50	relapse_1	37	relapse_2
24	ENST00000536559.1:c.131A>C	CCND1	c.131A>C	Y44S	uncertain significance/pathogenic	yes	no	50	relapse_1	36	relapse_2
24	ENST00000288943.4:c.662G>C	DUSP2	c.662G>C	S221T	uncertain significance	no	no	41	relapse_1	33	relapse_2
24	ENST00000288943.4:c.720A>G	DUSP2	c.720A>G	I240M	uncertain significance	no	no	42	relapse_1	33	relapse_2
24	ENST00000455089.5:c.2749C>T	EGFR	c.2749C>T	R917C	uncertain significance	yes	yes	57	relapse_1	51	relapse_2
24	ENST00000409508.7:c.8516G>A	DNAH11	c.8516G>A	R2839H	uncertain significance	no	not provided	35	relapse_1	38	relapse_2
24	ENST00000641206.2:c.10523G>C	ZFHX3	c.10523G>C	G3508A	uncertain significance	no	no	13	relapse_1	0	relapse_2
24	ENST00000327134.7:c.383A>G	PAK2	c.383A>G	K128R	uncertain significance	no	not provided	0	relapse_1	10	relapse_2
25	ENST00000452508.6:c.6833T>A	ATM	c.6833T>A	I2278N	uncertain significance/pathogenic	yes	yes	83.0409	relapse_1	89.1667	relapse_2
25	ENST00000389301.7:c.3250C>T	FANCA	c.3250C>T	R1084C	uncertain significance	no	no	49	relapse_1	41	relapse_2
25	ENST00000318607.9:c.1223A>T	PABPC1	c.1223A>T	Y408F	uncertain significance	no	not provided	0	relapse_1	10	relapse_2
26	ENST00000380013.8:c.2725C>T	TET2	c.2725C>T	Q909*	pathogenic	no	no	18	relapse_2	10	relapse_3
26	ENST00000269305.8:c.796G>T	TP53	c.796G>T	G266*	pathogenic	yes	no	6	relapse_2	22	relapse_3
26	ENST00000355710.7:c.2372A>T	RET	c.2372A>T	Y791F	uncertain significance/pathogenic	yes	yes	49	relapse_2	51	relapse_3
26	ENST00000256078.8:c.176C>A	KRAS	c.176C>A	A59E	pathogenic	yes	yes	34	relapse_2	51	relapse_3
26	ENST00000343677.3:c.119T>A	HIST1H1C	c.119T>A	V40E	uncertain significance	no	not provided	65.7559	relapse_2	57.9399	relapse_3
26	ENST00000259008.6:c.139C>G	BRIP1	c.139C>G	P47A	pathogenic	no	yes	47	relapse_2	24	relapse_3
26	ENST00000396373.8:c.29T>C	ETV6	c.29T>C	I10T	uncertain significance	no	no	39.1705	relapse_2	34.8361	relapse_3
27	ENST00000262189.10:c.1014G>A	KMT2C	c.1014G>A	S338S	likely pathogenic	no	no	23	relapse_4	33	relapse_5
27	ENST00000433197.3:c.2170A>G	ERN1	c.2170A>G	S724G	uncertain significance/pathogenic	no	not provided	16	relapse_4	36	relapse_5
27	ENST00000269305.8:c.403T>C	TP53	c.403T>C	C135R	pathogenic	yes	no	0	relapse_4	10	relapse_5
28	ENST00000380152.7:c.8182G>A	BRCA2	c.8182G>A	V2728I	uncertain significance	yes	yes	52	relapse_1	82	relapse_2
28	ENST00000355710.7:c.2372A>T	RET	c.2372A>T	Y791F	uncertain significance/pathogenic	yes	yes	45	relapse_1	48	relapse_2
28	ENST00000481110.6:c.551C>T	FGFR3	c.551C>T	P184L	uncertain significance	yes	yes	6	relapse_1	36	relapse_2
29	ENST00000380013.8:c.1841G>A	TET2	c.1841G>A	G614E	nie ma	no	no	15	relapse_5	5	relapse_6
29	ENST00000262189.10:c.5013G>T	KMT2C	c.5013G>T	W1671C	uncertain significance/pathogenic	no	no	34	relapse_5	41	relapse_6
29	ENST00000262189.10:c.6368C>G	KMT2C	c.6368C>G	S2123*	pathogenic	no	no	49	relapse_5	47	relapse_6
29	ENST00000420124.2:c.6934C>T	KMT2B	c.6934C>T	Q2312*	pathogenic	no	no	10	relapse_5	3	relapse_6
29	ENST00000452508.6:c.6745G>T	ATM	c.6745G>T	D2249Y	uncertain significance	yes	yes	15	relapse_5	1	relapse_6
29	ENST00000358933.9:c.586G>C	EDC4	c.586G>C	D196H	uncertain significance/pathogenic	no	not provided	11	relapse_5	6	relapse_6
29	ENST00000350721.8:c.7375C>A	ATR	c.7375C>A	R2459S	uncertain significance/pathogenic	yes	no	11	relapse_5	6	relapse_6
29	ENST00000526495.5:c.5532G>C	DICER1	c.5532G>C	K1844N	uncertain significance	no	no	12	relapse_5	6	relapse_6
29	ENST00000271588.8:c.4847A>C	HMCN1	c.4847A>C	Y1616S	uncertain significance	no	not provided	14	relapse_5	1	relapse_6
29	ENST00000271588.8:c.4864A>T	HMCN1	c.4864A>T	N1622Y	uncertain significance	no	not provided	15	relapse_5	1	relapse_6
29	ENST00000263967.3:c.42C>G	PIK3CA	c.42C>G	H14Q	uncertain significance/pathogenic	yes	yes	13	relapse_5	1	relapse_6
29	ENST00000409792.3:c.973G>C	SETD2	c.973G>C	E325Q	uncertain significance	no	no	10	relapse_5	5	relapse_6
29	ENST00000375759.7:c.766C>G	SPEN	c.766C>G	Q256E	uncertain significance/pathogenic	no	no	17	relapse_5	8	relapse_6
29	ENST00000369577.7:c.1657G>T	ZNF292	c.1657G>T	G553C	uncertain significance/pathogenic	no	not provided	11	relapse_5	4	relapse_6
29	ENST00000409508.7:c.4196A>G	DNAH11	c.4196A>G	E1399G	uncertain significance/pathogenic	no	not provided	5	relapse_5	10	relapse_6
29	ENST00000641206.2:c.2556C>G	ZFHX3	c.2556C>G	S852R	uncertain significance	no	no	10	relapse_5	8	relapse_6
29	ENST00000641206.2:c.8440G>A	ZFHX3	c.8440G>A	E2814K	uncertain significance	no	no	48.2529	relapse_5	44.9925	relapse_6
29	ENST00000394329.7:c.10571G>A	FAT4	c.10571G>A	G3524D	uncertain significance	no	not provided	47	relapse_5	49	relapse_6
29	ENST00000646891.1:c.1406G>C	BRAF	c.1406G>C	G469A	pathogenic	yes	yes	45	relapse_5	41	relapse_6
29	ENST00000367255.9:c.2201C>G	SYNE1	c.2201C>G	P734R	uncertain significance/pathogenic	no	not provided	43	relapse_5	47	relapse_6
29	ENST00000342160.7:c.707C>T	HUWE1	c.707C>T	P236L	uncertain significance/pathogenic	no	not provided	10	relapse_5	8	relapse_6
29	ENST00000374561.5:c.164T>A	ID3	c.164T>A	V55E	uncertain significance/pathogenic	no	no	45	relapse_5	45	relapse_6
29	ENST00000357628.7:c.517G>C	POT1	c.517G>C	E173Q	uncertain significance	no	no	51	relapse_5	49	relapse_6
29	ENST00000216225.8:c.254C>T	RBX1	c.254C>T	S85F	uncertain significance/pathogenic	no	not provided	44.6281	relapse_5	46.1538	relapse_6
29	ENST00000245479.2:c.1079C>T	SOX9	c.1079C>T	P360L	uncertain significance	no	no	10	relapse_5	9	relapse_6
29	ENST00000324545.8:c.2939C>G	USP9X	c.2939C>G	S980C	uncertain significance/pathogenic	no	no	94.9275	relapse_5	95.4839	relapse_6
29	ENST00000326195.12:c.1540G>A	ABCF1	c.1540G>A	V514I	uncertain significance/pathogenic	no	no	10	relapse_5	0	relapse_6
29	ENST00000452508.6:c.6739A>C	ATM	c.6739A>C	I2247L	uncertain significance	yes	yes	15	relapse_5	0	relapse_6
29	ENST00000405201.5:c.2462T>G	NCOR2	c.2462T>G	V821G	uncertain significance	no	no	11.3861	relapse_5	0	relapse_6
29	ENST00000263967.3:c.40C>A	PIK3CA	c.40C>A	H14N	uncertain significance/pathogenic	yes	yes	13	relapse_5	0	relapse_6
29	ENST00000263967.3:c.44T>G	PIK3CA	c.44T>G	L15W	uncertain significance/pathogenic	yes	yes	12.5926	relapse_5	0	relapse_6
29	ENST00000366574.6:c.7033G>C	RYR2	c.7033G>C	A2345P	uncertain significance	no	not provided	12	relapse_5	0	relapse_6
29	ENST00000269305.8:c.417G>T	TP53	c.417G>T	K139N	likely pathogenic	yes	no	0	relapse_5	47	relapse_6
30	ENST00000301067.11:c.9370G>A	KMT2D	c.9370G>A	E3124K	uncertain significance	no	no	0	relapse_5	0	relapse_6	10	relapse_7
30	ENST00000301067.11:c.5875G>A	KMT2D	c.5875G>A	G1959R	uncertain significance	no	no	0	relapse_5	0	relapse_6	13	relapse_7
30	ENST00000534358.5:c.2408T>A	KMT2A	c.2408T>A	L803Q	uncertain significance	no	no	0	relapse_5	0	relapse_6	13.5	relapse_7
30	ENST00000641206.2:c.8780G>C	ZFHX3	c.8780G>C	S2927T	uncertain significance	no	no	4	relapse_5	2	relapse_6	10	relapse_7
30	ENST00000641206.2:c.2556C>G	ZFHX3	c.2556C>G	S852R	uncertain significance	no	no	3	relapse_5	3	relapse_6	12	relapse_7
30	ENST00000358933.9:c.586G>C	EDC4	c.586G>C	D196H	uncertain significance/pathogenic	no	not provided	4	relapse_5	2	relapse_6	14	relapse_7
30	ENST00000373187.5:c.2813C>T	PTPRT	c.2813C>T	P938L	uncertain significance	no	no	45	relapse_5	44	relapse_6	55	relapse_7
30	ENST00000481110.6:c.2204G>A	FGFR3	c.2204G>A	R735Q	likely pathogenic	yes	yes	85	relapse_5	88	relapse_6	55	relapse_7
30	ENST00000389484.7:c.3058C>A	LRP1B	c.3058C>A	P1020T	uncertain significance/pathogenic	no	not provided	7	relapse_5	2	relapse_6	10	relapse_7
30	ENST00000470747.4:c.188A>C	HOXA9	c.188A>C	K63T	not provided	no	not provided	65	relapse_5	64	relapse_6	46	relapse_7
30	ENST00000405201.5:c.2854C>T	NCOR2	c.2854C>T	R952W	uncertain significance	no	no	58	relapse_5	55	relapse_6	49	relapse_7
30	ENST00000646891.1:c.1799T>A	BRAF	c.1799T>A	V600E	pathogenic	yes	yes	39	relapse_5	34	relapse_6	0	relapse_7
30	ENST00000318607.9:c.1223A>T	PABPC1	c.1223A>T	Y408F	uncertain significance	no	not provided	10	relapse_5	16	relapse_6	0	relapse_7
30	ENST00000298910.11:c.4244A>C	LRRK2	c.4244A>C	Y1415S	uncertain significance/pathogenic	no	not provided	0	relapse_5	3	relapse_6	11	relapse_7
30	ENST00000375759.7:c.766C>G	SPEN	c.766C>G	Q256E	uncertain significance/pathogenic	no	no	0	relapse_5	2	relapse_6	12	relapse_7
30	ENST00000526495.5:c.5532G>C	DICER1	c.5532G>C	K1844N	uncertain significance	no	no	0	relapse_5	0	relapse_6	13	relapse_7
30	ENST00000262903.8:c.49C>A	HACE1	c.49C>A	R17S	uncertain significance	no	no	0	relapse_5	0	relapse_6	19.4444	relapse_7
30	ENST00000262903.8:c.40T>G	HACE1	c.40T>G	S14A	uncertain significance	no	no	0	relapse_5	0	relapse_6	19.4444	relapse_7
30	ENST00000262903.8:c.28C>G	HACE1	c.28C>G	R10G	uncertain significance	no	no	0	relapse_5	0	relapse_6	17.1429	relapse_7
30	ENST00000409792.3:c.973G>C	SETD2	c.973G>C	E325Q	uncertain significance	no	no	0	relapse_5	0	relapse_6	11	relapse_7
30	ENST00000457599.6:c.3094G>C	ARID1A	c.3094G>C	E1032Q	likely pathogenic	no	yes	0	relapse_5	0	relapse_6	10	relapse_7
30	ENST00000457599.6:c.3091A>C	ARID1A	c.3091A>C	T1031P	uncertain significance/pathogenic	no	yes	0	relapse_5	0	relapse_6	10	relapse_7
30	ENST00000457599.6:c.3098A>T	ARID1A	c.3098A>T	E1033V	likely pathogenic	no	yes	0	relapse_5	0	relapse_6	10.1562	relapse_7
31	ENST00000394329.7:c.3682C>G	FAT4	c.3682C>G	Q1228E	uncertain significance/pathogenic	no	not provided	28	relapse_4	3	relapse_5	15	relapse_6
31	ENST00000367255.9:c.20506C>T	SYNE1	c.20506C>T	R6836C	uncertain significance	no	not provided	28	relapse_4	4	relapse_5	21	relapse_6
31	ENST00000398568.6:c.1240C>T	CYLD	c.1240C>T	H414Y	likely pathogenic	no	no	16	relapse_4	48	relapse_5	28	relapse_6
31	ENST00000479692.2:c.98A>G	CDKN2A	c.98A>G	D33G	pathogenic	yes	yes	11	relapse_4	55	relapse_5	28	relapse_6
31	ENST00000380956.8:c.1325G>A	IRF4	c.1325G>A	R442K	uncertain significance	no	no	18	relapse_4	27	relapse_5	20	relapse_6
31	ENST00000409508.7:c.9540A>T	DNAH11	c.9540A>T	L3180F	uncertain significance	no	not provided	0	relapse_4	39	relapse_5	31	relapse_6
32	ENST00000296682.3:c.1056A>T	PRDM9	c.1056A>T	E352D	uncertain significance	no	not provided	22	relapse_7	16	relapse_8
32	ENST00000297405.9:c.4967G>T	CSMD3	c.4967G>T	G1656V	uncertain significance	no	not provided	28	relapse_7	25	relapse_8
32	ENST00000359596.7:c.8671A>C	RYR1	c.8671A>C	K2891Q	uncertain significance/pathogenic	no	not provided	66	relapse_7	55	relapse_8
32	ENST00000318607.9:c.1223A>T	PABPC1	c.1223A>T	Y408F	uncertain significance	no	not provided	15	relapse_7	22	relapse_8
32	ENST00000334344.10:c.940C>T	ARID2	c.940C>T	R314C	uncertain significance	no	no	31	relapse_7	18	relapse_8
33	ENST00000601538.5:c.3484G>A	SHANK2	c.3484G>A	E1162K	uncertain significance	no	not provided	31	relapse_1	22	relapse_3
33	ENST00000611869.4:c.793T>G	TCF3	c.793T>G	F265V	uncertain significance	no	no	27	relapse_1	19	relapse_3
33	ENST00000641206.2:c.2556C>G	ZFHX3	c.2556C>G	S852R	uncertain significance	no	no	4	relapse_1	10	relapse_3
33	ENST00000389484.7:c.3075T>G	LRP1B	c.3075T>G	C1025W	uncertain significance	no	not provided	5	relapse_1	12	relapse_3
33	ENST00000403625.6:c.639C>G	MAST4	c.639C>G	S213R	uncertain significance	no	not provided	6	relapse_1	10	relapse_3
33	ENST00000265104.4:c.2443T>A	DNAH5	c.2443T>A	p.L815M	uncertain significance	no	no	74	relapse_1	66.1	relapse_3
33	ENST00000256078.8:c.183A>C	KRAS	c.183A>C	Q61H	pathogenic	yes	yes	46	relapse_1	32	relapse_3
33	ENST00000350721.8:c.7375C>A	ATR	c.7375C>A	R2459S	uncertain significance/pathogenic	yes	no	0	relapse_1	10	relapse_3
33	ENST00000358933.9:c.586G>C	EDC4	c.586G>C	D196H	uncertain significance/pathogenic	no	not provided	0	relapse_1	10	relapse_3
33	ENST00000389484.7:c.3058C>A	LRP1B	c.3058C>A	P1020T	uncertain significance/pathogenic	no	not provided	0	relapse_1	11	relapse_3
33	ENST00000405201.5:c.2462T>G	NCOR2	c.2462T>G	V821G	uncertain significance	no	no	0	relapse_1	10	relapse_3
33	ENST00000366574.6:c.7033G>C	RYR2	c.7033G>C	A2345P	uncertain significance	no	not provided	0	relapse_1	12	relapse_3
33	ENST00000245479.2:c.1079C>T	SOX9	c.1079C>T	P360L	uncertain significance	no	no	0	relapse_1	10	relapse_3
33	ENST00000457599.6:c.2390G>C	ARID1A	c.2390G>C	G797A	uncertain significance/pathogenic	no	yes	0	relapse_1	10	relapse_3
	[1] Kopanos, C.; Tsiolkas, V.; Kouris, A.; Chapple, C.E.; Albarca Aguilera, M.; Meyer, R.; Massouras, A. VarSome: The Human Genomic Variant Search Engine. Bioinformatics 2019, 35, 1978–1980, doi:10.1093/BIOINFORMATICS/BTY897.
	[2] https://software.broadinstitute.org/cancer/cga/target
	[3] https://www.oncokb.org
	[*] Likely Oncogenic/Likely Loss-of-function according to the OnkoKB database
	Abreviations: ACMG, American College of Medical Genetics; cDNA, complementary DNA, CNV, copy number variant, Dx – diagnosis, PD – progressive disease, VAF – variant allele frequency.
